# 1 **Post-Transcriptional Regulation of Antiviral Gene Expression by N6-Methyladenosine**

2

3 Michael J. McFadden <sup>1</sup>, Alexa B.R. McIntyre <sup>2,3,a\*</sup>, Haralambos Mourelatos <sup>4\*</sup>, Nathan S. Abell  
4 <sup>5,6\*</sup>, Nandan S. Gokhale <sup>1,b</sup>, H el ene Ipas <sup>5</sup>, Blerta Xhemal e <sup>5\*\*</sup>, Christopher E. Mason <sup>2,3,7\*\*</sup>,  
5 Stacy M. Horner<sup>† 1,8</sup>

6

## 7 Affiliations:

8 <sup>1</sup> Department of Molecular Genetics and Microbiology, Duke University Medical Center,  
9 Durham, NC 27710, USA.

10 Michael J. McFadden; michael.mcfadden@duke.edu, Nandan S. Gokhale;  
11 ngokhale@uw.edu, Stacy M. Horner; stacy.horner@duke.edu

12 <sup>2</sup> Department of Physiology and Biophysics, Weill Cornell Medicine, New York, NY 10021,  
13 USA.

14 Alexa B.R. McIntyre; abm237@cornell.edu, Christopher E. Mason;  
15 chm2042@med.cornell.edu

16 <sup>3</sup> Tri-Institutional Program in Computational Biology and Medicine, New York City, NY  
17 10021, USA.

18 Alexa B.R. McIntyre; abm237@cornell.edu, Christopher E. Mason;  
19 chm2042@med.cornell.edu

20 <sup>4</sup> Weill Cornell/Rockefeller/Memorial Sloan Kettering Tri-Institutional MD-PhD Program,  
21 New York, NY, 10021, USA.

22 Haralambos Mourelatos; ham4006@med.cornell.edu

23 <sup>5</sup> Department of Molecular Biosciences, University of Texas at Austin, Austin, TX 78712,  
24 USA.

25 Nathan S. Abell; nsabell@stanford.edu, H el ene Ipas; helene.ipas@utexas.edu, Blerta  
26 Xhemal e; b.xhemalce@austin.utexas.edu.

27 <sup>6</sup> Department of Genetics, Stanford University School of Medicine, 300 Pasteur Drive,  
28 Stanford, CA 94305-5324, USA.

29 Nathan S. Abell; nsabell@stanford.edu

30 <sup>7</sup> The HRH Prince Alwaleed Bin Talal Bin Abdulaziz Alsaud Institute for  
31 Computational Biomedicine, Weill Cornell Medicine, New York, NY, 10021, USA.

32 Christopher E. Mason; chm2042@med.cornell.edu

33 <sup>8</sup> Department of Medicine, Duke University Medical Center, Durham, NC 27710, USA.

34 Stacy M. Horner; stacy.horner@duke.edu

35

36 Current address:

37 <sup>a</sup> Department of Molecular Life Sciences, University of Zurich, Switzerland

38 <sup>b</sup> Department of Immunology, University of Washington, Seattle WA 98109

39

40 \*, \*\* Equal Contribution

41

42 † Corresponding author

43 Correspondence to Stacy M. Horner ([stacy.horner@duke.edu](mailto:stacy.horner@duke.edu))

44

45

## 46 **Summary**

47           Type I interferons (IFN) induce hundreds of IFN-stimulated genes (ISGs) in response to  
48 viral infection. These ISGs require strict regulation for an efficient and controlled antiviral  
49 response, but post-transcriptional controls of these genes have not been well defined. Here, we  
50 identify a new role for the RNA base modification *N*6-methyladenosine (m<sup>6</sup>A) in the regulation of  
51 ISGs. Using ribosome profiling and quantitative mass spectrometry, coupled with m<sup>6</sup>A-  
52 immunoprecipitation and sequencing, we identified a subset of ISGs, including *IFITM1*, whose  
53 translation is enhanced by m<sup>6</sup>A and the m<sup>6</sup>A methyltransferase proteins METTL3 and METTL14.  
54 We further determined that the m<sup>6</sup>A reader YTHDF1 increases the expression of *IFITM1* in an  
55 m<sup>6</sup>A binding-dependent manner. Importantly, we found that the m<sup>6</sup>A methyltransferase complex  
56 promotes the antiviral activity of type I IFN. Thus, these studies identify m<sup>6</sup>A as a post-  
57 transcriptional control of ISG translation during the type I IFN response for antiviral restriction.

58

## 59 **Introduction**

60           The IFN family cytokines are potent inhibitors of viral infection that induce hundreds of  
61 ISGs, many of which have antiviral activity (Gonzalez-Navajas et al., 2012; Schoggins and Rice,  
62 2011). Type I IFNs (IFN- $\alpha$  and IFN- $\beta$ ) are produced in response to viral infection, and they activate  
63 autocrine and paracrine signaling responses through the JAK-STAT pathway (Stark and Darnell,  
64 2012). Specifically, type I IFNs bind to a dimeric receptor (IFNAR), composed of two subunits,  
65 IFNAR1 and IFNAR2. IFNAR engagement then activates the Janus kinases JAK1 and TYK2,  
66 which phosphorylate the transcription factors STAT1 and STAT2, inducing their hetero-  
67 dimerization and interaction with IRF9, to form the ISGF3 transcription factor complex. ISGF3  
68 then translocates into the nucleus, where it binds to IFN-stimulated response elements within the  
69 promoters of ISGs to elicit their transcriptional activation (Stark and Darnell, 2012). Many of these  
70 ISGs encode antiviral effector proteins that inhibit multiple stages of viral replication and thus  
71 establish an early defense against viral replication (Schoggins, 2019). Dysregulation of type I IFNs  
72 can lead to viral susceptibility or autoimmune disease (Banchereau and Pascual, 2006; Teijaro,  
73 2016), demonstrating the importance of tight regulatory control of both IFN activation and the IFN  
74 response. Indeed, both activation and suppression of the type I IFN response are coordinated at  
75 multiple levels, such as by epigenetic modifiers (Fang et al., 2012; Huang et al., 2002; Liu et al.,  
76 2002) or by post-transcriptional mechanisms including microRNA regulation and alternative  
77 splicing (Forster et al., 2015; West et al., 2019). However, our overall understanding of post-  
78 transcriptional regulation of ISG expression is still emerging. Additionally, while a number of  
79 studies have identified subsets of ISGs that have unique transcriptional regulators, other

80 mechanisms that govern the regulation of subclasses of ISGs have not been well characterized  
81 (Froggatt et al., 2019; Perwitasari et al., 2011; Seifert et al., 2019).

82 The RNA base modification m<sup>6</sup>A is deposited on RNA by a methyltransferase complex of  
83 METTL3 and METTL14 (METTL3/14), among other proteins (Liu et al., 2014). m<sup>6</sup>A coordinates  
84 biological processes through various effects on modified mRNAs (Meyer and Jaffrey, 2017; Shi  
85 et al., 2019), including increased mRNA turnover and translation, as well as other processes.  
86 These effects are mediated by m<sup>6</sup>A reader proteins, such as YTHDF proteins (Liu et al., 2019a;  
87 Wang et al., 2014; Wang et al., 2015). Specifically, YTHDF1 increases translation (Wang et al.,  
88 2015), YTHDF2 mediates mRNA degradation (Wang et al., 2014), and YTHDF3 cooperatively  
89 enhances both of these processes (Shi et al., 2017), although in some cases these proteins may  
90 have overlapping functions (Zaccara and Jaffrey, 2020). Through the actions of m<sup>6</sup>A reader  
91 proteins, m<sup>6</sup>A can regulate infection by many viruses through modulation of both viral and host  
92 transcripts (Williams et al., 2019). We recently profiled changes to the m<sup>6</sup>A landscape of host  
93 mRNAs during *Flaviviridae* infection and identified both proviral and antiviral transcripts regulated  
94 by m<sup>6</sup>A during infection (Gokhale et al., 2019). Others have found that m<sup>6</sup>A prevents RNA sensing  
95 or regulates the expression of signaling molecules involved in the production of cytokines such  
96 as type I IFNs (Chen et al., 2019; Durbin et al., 2016; Feng et al., 2018; Kariko et al., 2005; Lu et  
97 al., 2020; Zheng et al., 2017) and that m<sup>6</sup>A can destabilize the *IFNB1* transcript, thereby directly  
98 regulating the production of IFN- $\beta$  (Rubio et al., 2018; Winkler et al., 2019). Therefore, m<sup>6</sup>A plays  
99 important roles in viral infection and the antiviral response (Zhang et al., 2019a); however, a role  
100 for m<sup>6</sup>A in the response to type I IFN and the production of ISGs has not been described.

101 Here, we mapped m<sup>6</sup>A in the IFN- $\beta$ -induced transcriptome and identified many ISGs that  
102 are m<sup>6</sup>A-modified. We found that METTL3/14 and m<sup>6</sup>A promote the translation of certain m<sup>6</sup>A-  
103 modified ISGs, in part through interactions between the transcripts of m<sup>6</sup>A-modified ISGs and the  
104 m<sup>6</sup>A reader protein YTHDF1. Importantly, we found that METTL3/14 and m<sup>6</sup>A-mediated  
105 enhancement of ISG expression promotes the antiviral effects of the IFN response, as  
106 METTL3/14 perturbation affected the replication of vesicular stomatitis virus (VSV) in IFN- $\beta$ -  
107 primed cells. Together, these results establish m<sup>6</sup>A as a post-transcriptional regulator of ISGs for  
108 an effective cellular antiviral response.

109

## 110 **Results**

### 111 **METTL3/14 regulates the translation of certain ISGs.**

112 IFN- $\beta$  induces the transcription of ISGs to shape the innate response to viral infection  
113 (Schoggins and Rice, 2011). To investigate whether m<sup>6</sup>A regulates the type I IFN response, we

114 measured the IFN- $\beta$ -induced expression of several ISGs with known antiviral functions  
115 (Schoggins, 2014) following depletion of the m<sup>6</sup>A methyltransferase complex METTL3/14 in Huh7  
116 cells. The IFN- $\beta$ -induced protein expression of the ISGs IFITM1 and MX1, but not ISG15 and  
117 EIF2AK2 (also called PKR), was reduced following depletion of METTL3/14 (Figure 1A; see  
118 Methods for information on IFITM1 antibody specificity). Similar results were also seen following  
119 METTL3/14 depletion in A549 cells, primary neonatal human dermal fibroblasts (NHDF), and also  
120 at multiple time points (8 h, 16 h, and 24 h) after IFN- $\beta$  in Huh7 cells (Figure S1A-1C); however  
121 we note MX1 protein levels were not as strongly affected in A549 and NHDF cells as in Huh7  
122 cells. Conversely, overexpression of METTL3/14 increased the abundance of IFITM1 and MX1,  
123 but not ISG15 and EIF2AK2, in response to IFN- $\beta$  in Huh7 cells (Figure 1B). Importantly, the  
124 METTL3/14-regulated ISGs, IFITM1 and MX1, were not expressed without stimulation of cells by  
125 IFN- $\beta$  (Figure 1A-1B). Therefore, any confounding effects of METTL3/14 perturbation on  
126 endogenous IFN- $\beta$  production are negligible for these experiments.

127 The METTL3/14 m<sup>6</sup>A methyltransferase complex regulates many aspects of mRNA  
128 metabolism (Liu et al., 2019a). To determine how METTL3/14 regulates the protein abundance  
129 of certain ISGs, we first tested whether METTL3/14 depletion led to a decrease in induction of  
130 ISG mRNA in response to IFN- $\beta$ . We measured the induction of ISG mRNA in response to IFN- $\beta$   
131 over a timecourse using RT-qPCR (Figure S1D). Neither the mRNA abundance nor the kinetics  
132 of IFN- $\beta$ -mediated induction of the METTL3/14-regulated ISGs *IFITM1* and *MX1* were affected by  
133 METTL3/14 depletion. The mRNA levels of the non-METTL3/14-regulated ISG *EIF2AK2* was  
134 unaffected, while *ISG15* mRNA was increased (Figure S1D). These data indicate that the mRNA  
135 abundance of *IFITM1* and *MX1* does not underlie the observed differences in protein levels,  
136 suggesting that neither the transcription nor the mRNA stability of these ISGs are regulated by  
137 METTL3/14 (Figure S1D). Further, using RNA-seq following IFN- $\beta$  treatment, we noted little effect  
138 of METTL3/14 depletion on the mRNA abundance of a defined set of core ISGs (Shaw et al.,  
139 2017) (Figure S1E) or expressed ISGs more broadly (Table S1). These data are in agreement  
140 with a previous report that found that collective ISG RNA stability is unaffected by METTL3  
141 depletion (Winkler et al., 2019).

142 As both METTL3/14 and m<sup>6</sup>A have been shown to promote the nuclear export of certain  
143 mRNAs (Lesbirel and Wilson, 2019), we also tested whether the nuclear export of select ISGs  
144 was altered by METTL3/14 depletion. However, after IFN stimulation, METTL3/14 depletion did  
145 not alter the nuclear-cytoplasmic ratio of the METTL3/14-regulated ISGs *IFITM1* and *MX1*, the  
146 non-regulated ISGs *ISG15* and *EIF2AK2*, a non-methylated control *HPRT1* (Wang et al., 2014),

147 or the nuclear-localized control *MALAT1* (Figure S2C). Therefore, METTL3/14 does not regulate  
 148 these ISGs through changes to their protein stability or nuclear export.

**Figure 1**

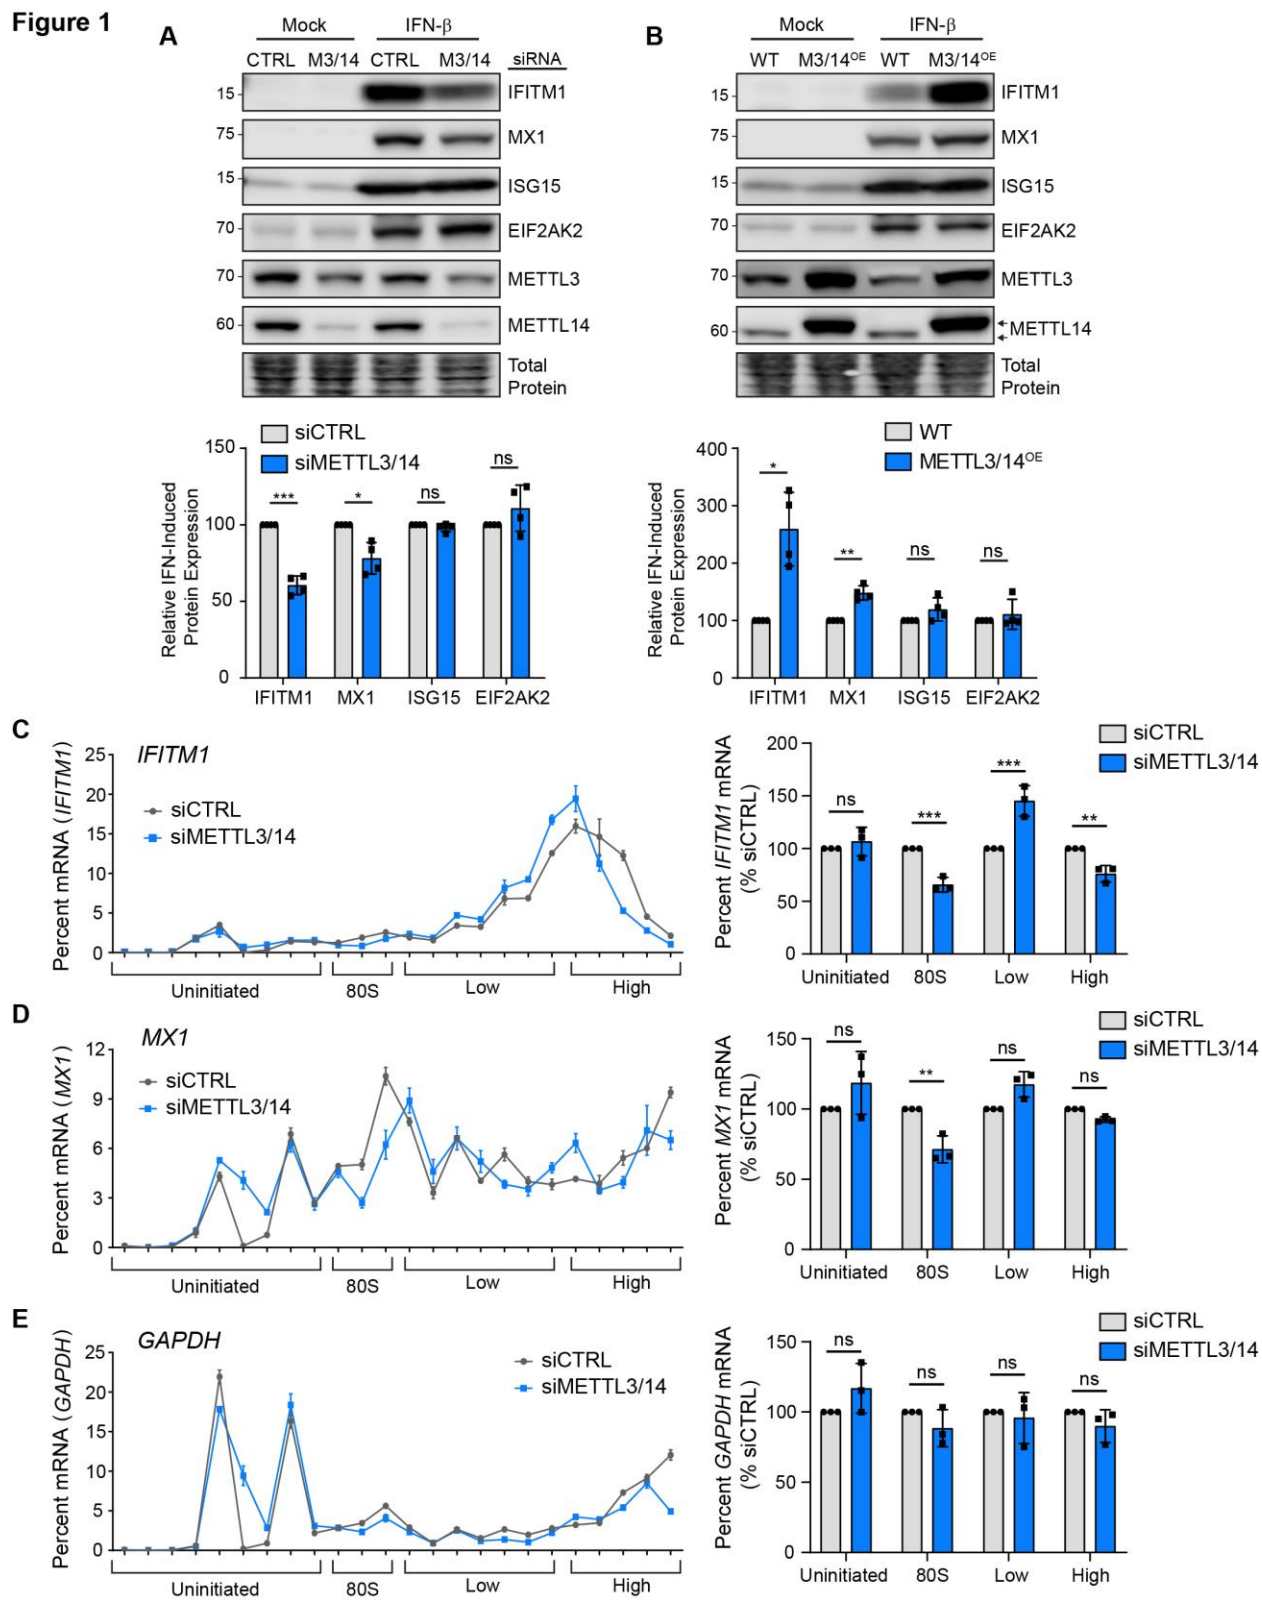

149

150 **Figure 1: METTL3/14 regulates translation of certain ISGs. (A, B)** Immunoblot analysis of  
151 extracts from Huh7 cells transfected with siRNAs to METTL3/14 (M3/14) or control (CTRL) **(A)** or  
152 stably overexpressing FLAG-METTL14 (M3/14<sup>OE</sup>; top arrow denotes FLAG-METTL14; bottom  
153 arrow denotes endogenous METTL14) **(B)** prior to mock or IFN- $\beta$  (24 h) treatment. Relative ISG  
154 expression from 4 replicates of (A) and (B) is quantified below relative to siCTRL +IFN- $\beta$  (A) or  
155 WT +IFN- $\beta$  (B). **(C-E)** RT-qPCR analysis of the relative percentage of *IFITM1* (C), *MX1* (D), and  
156 *GAPDH* (E) mRNA across 24 sucrose gradient fractions isolated from extracts of IFN- $\beta$ -treated  
157 (6 h) Huh7 cells treated with CTRL or METTL3/14 siRNA. The uninitiated (free, 40S, and 60S  
158 subunits), initiated (80S), low or high molecular weight polysomes, are noted. Graphs on the right  
159 show the percentages of mRNAs in combined fractions for *IFITM1*, *MX1*, or *GAPDH*. Percentages  
160 from fractions were added to yield the total percentage in each category. Values are the mean  $\pm$   
161 SEM of 4 biological replicates (A-B), the mean  $\pm$  SD of 3 technical replicates, representative of 3  
162 experiments (C-E, left graphs), and the mean  $\pm$  SEM of 3 biological replicates (C-E, right graphs).  
163 \*  $p < 0.05$ , \*\*  $p < 0.01$ , \*\*\*  $p < 0.005$  by unpaired Student's t test (A-B), and 2-way ANOVA with  
164 Sidak's multiple comparisons test (C-E). ns = not significant. See also Figure S1-S2.

165  
166 To test whether METTL3/14 regulates the translation of *IFITM1*, we measured the  
167 polysome occupancy of *IFITM1* induced by IFN- $\beta$  in control cells or in those depleted of  
168 METTL3/14. METTL3/14 depletion did not change overall polysome density, as observed by the  
169 similar relative absorption across fractions (Figure S2D). However, METTL3/14 depletion did  
170 result in lower levels of *IFITM1* mRNA in the 80S fractions and a shift from the heavy to the light  
171 polysome fractions (Figure 1C), indicating impaired translation of *IFITM1* following METTL3/14  
172 depletion. A similar, yet less pronounced shift was observed for *MX1* (Figure 1D), while the  
173 polysome occupancy of the housekeeping control gene *GAPDH* was unaffected (Figure 1E).  
174 These results indicate that METTL3/14 regulates the translation of certain ISGs, such as *IFITM1*  
175 and *MX1*.

176  
177 **METTL3/14-regulated ISGs are modified by m<sup>6</sup>A.**

178 To determine whether the METTL3/14-regulated ISGs *IFITM1* and *MX1*, as well as other  
179 ISGs, are m<sup>6</sup>A-modified, we mapped m<sup>6</sup>A in the IFN-induced transcriptome in Huh7 cells using  
180 methylated RNA immunoprecipitation and sequencing (MeRIP-seq) (Dominissini et al., 2012;  
181 Meyer et al., 2012). After defining the ISGs in this experiment (Figure S3A; Table S2), we then  
182 called peaks in read coverage post-m<sup>6</sup>A immunoprecipitation compared to input using the MeTDiff  
183 m<sup>6</sup>A peak caller (Cui et al., 2018) (Table S2). We observed that peaks across mRNAs were  
184 enriched around the end of the coding sequence and the beginning of the 3' UTR, as expected  
185 (Dominissini et al., 2012; Meyer et al., 2012) (Figure 2A). The most highly enriched RNA sequence  
186 motif within peaks was [U/A]GGAC, which matches the known m<sup>6</sup>A motif of DRAMC (Dominissini

187 et al., 2012; Meyer et al., 2012) (Figure 2A). We found that approximately 85% percent of ISGs,  
188 classified as those upregulated more than 4-fold following IFN treatment, were m<sup>6</sup>A-modified, as  
189 compared to 74% percent of the expressed transcriptome of Huh7 cells (mean coverage  $\geq 10$ )  
190 (Figure 2B). This was consistent with a previous study that found that ISGs were m<sup>6</sup>A-modified at  
191 a similar percentage to the transcriptome (Winkler et al., 2019). The percent of ISGs that are m<sup>6</sup>A-  
192 modified was similar among other classes of ISGs, including a 'core' class of ISGs that are  
193 evolutionarily conserved among vertebrate species and a subset of 14 of these core ISGs with  
194 known antiviral functions (Shaw et al., 2017) (Figure 2B). Plotting the MeRIP-seq reads relative  
195 to the input reads of individual genes can be informative of m<sup>6</sup>A status, as m<sup>6</sup>A peak calling  
196 methods have known limitations (McIntyre et al., 2020). Thus, we generated plots for *IFITM1*,  
197 *MX1*, *ISG15*, and *EIF2AK2* and used the m<sup>6</sup>A peak callers MeTDiff (Cui et al., 2018) and  
198 meRIPPer (<https://sourceforge.net/projects/meripper/>) (Table S2) to reveal that the METTL3/14-  
199 regulated genes *IFITM1* and *MX1* had m<sup>6</sup>A peaks (Figure 2C-D), while *ISG15* and *EIF2AK2*  
200 lacked called m<sup>6</sup>A peaks (Figure 2E-F). These plots suggested that the 3' UTR of *ISG15* may also  
201 contain an m<sup>6</sup>A site (Figure 2E). We then compared the m<sup>6</sup>A status of ISGs from our MeRIP-seq  
202 experiment to data from previously published studies that profiled m<sup>6</sup>A after IFN-inducing  
203 treatments, such as dsDNA (Rubio et al., 2018) or human cytomegalovirus (HCMV) infection  
204 (Winkler et al., 2019) (Figure S3B). This comparison showed consistent prediction of m<sup>6</sup>A  
205 methylation status for core antiviral ISGs among all three studies (Figure S3B). Indeed, dsDNA  
206 treatment potently activates IFN production and elicited m<sup>6</sup>A modification of the same core  
207 antiviral ISGs found in our experiment. Infection with HCMV also elicited m<sup>6</sup>A modification of  
208 certain ISGs, although fewer peaks were called in these ISGs after HCMV infection than after  
209 IFN- $\beta$  treatment or dsDNA treatment (Figure S3B). We note this virus encodes factors to dampen  
210 IFN signaling (Miller et al., 1999), therefore ISGs are likely not as strongly induced as compared  
211 to dsDNA or IFN- $\beta$  treatment. The presence of m<sup>6</sup>A on many ISGs suggests that m<sup>6</sup>A may  
212 regulate the antiviral type I IFN response.



**Figure 2**

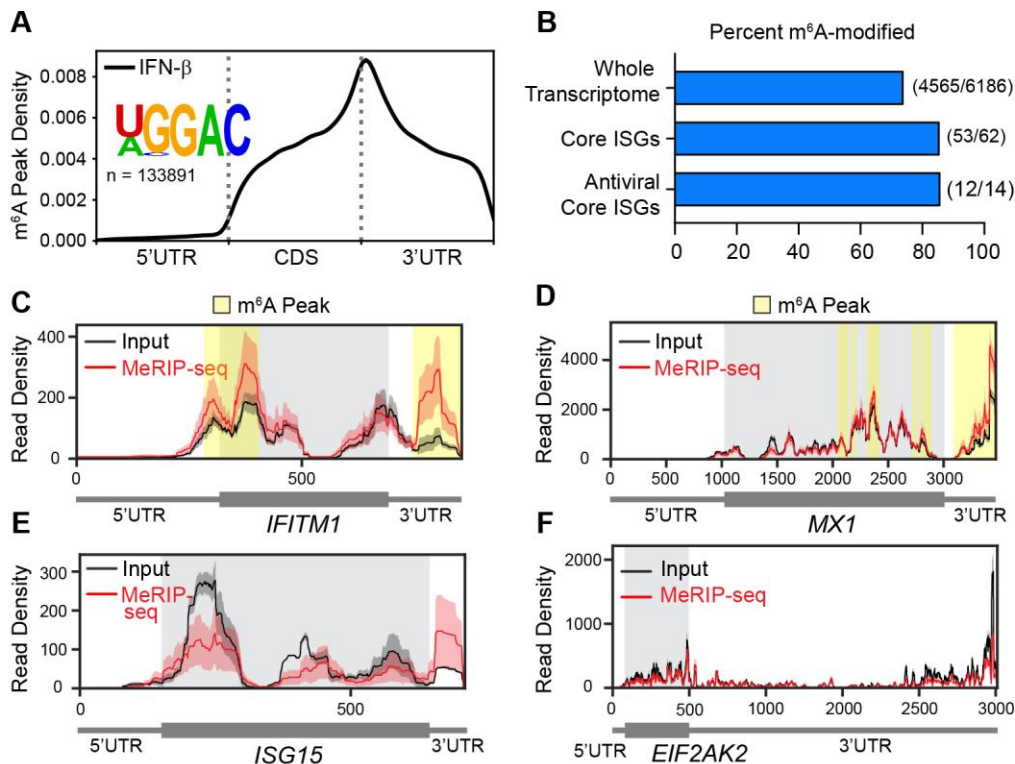

213

214 **Figure 2: METTL3/14-regulated ISGs are modified by m<sup>6</sup>A.** (A) Metagenome plot of predicted m<sup>6</sup>A  
215 distribution across the transcriptome following IFN- $\beta$  treatment (8 h), with relative positions of  
216 DRACH motif sites under statistically significant peaks plotted, as well as the most highly enriched  
217 motif under peaks. (B) The percent of genes modified by m<sup>6</sup>A in the expressed transcriptome,  
218 genes with mRNA induction  $\geq$  4-fold in response to IFN- $\beta$  treatment (ISGs), a group of core ISGs  
219 conserved in vertebrate species (Shaw et al., 2017), or a subset of these core ISGs with antiviral  
220 functions (Shaw et al., 2017). (C-F) Read coverage plots of MeRIP (red) and input (black) reads  
221 in *IFITM1* (C), *MX1* (D), *ISG15* (E), and *EIF2AK2* (F) transcripts. Variance between biological  
222 replicates is represented by red and black shading around read coverage. Gray shading  
223 represents coding sequence, yellow shading represents m<sup>6</sup>A peaks called by MeTDiff (Cui et al.,  
224 2018) and meRIPPer (<https://sourceforge.net/projects/meripper/>)  
225 software. All analyses are performed on 3 biological replicates. See also Figure S3.

226

### 227 m<sup>6</sup>A modification in the 3' UTR of *IFITM1* enhances its translation.

228 m<sup>6</sup>A is known to enhance the translation of certain mRNAs (Coots et al., 2017; Gokhale  
229 et al., 2019; Lin et al., 2016; Mao et al., 2019; Wang et al., 2015). Specifically, the m<sup>6</sup>A reader  
230 protein YTHDF1 can recognize m<sup>6</sup>A within 3' UTRs and associate with eukaryotic translation  
231 initiation factors such as eIF3 to enhance the translation of m<sup>6</sup>A-modified transcripts (Wang et al.,  
232 2015). To determine whether the translational regulation of ISGs by METTL3/14 is elicited through  
233 m<sup>6</sup>A, we used *IFITM1* as a model METTL3/14-regulated ISG. We first determined the effect of

234 METTL3/14 depletion on m<sup>6</sup>A modification of *IFITM1*. MeRIP-RT-qPCR revealed that *IFITM1*  
235 mRNA was enriched above the m<sup>6</sup>A-negative ISG *EIF2AK2* and a spiked-in m<sup>6</sup>A-negative  
236 synthetic RNA, confirming that it contains m<sup>6</sup>A. METTL3/14 depletion reduced the m<sup>6</sup>A-  
237 enrichment of *IFITM1* mRNA but not of the m<sup>6</sup>A-negative *EIF2AK2* transcript or the m<sup>6</sup>A-negative  
238 synthetic RNA (Figure 3A-B). These data reveal that *IFITM1* is m<sup>6</sup>A-modified by METTL3/14.  
239

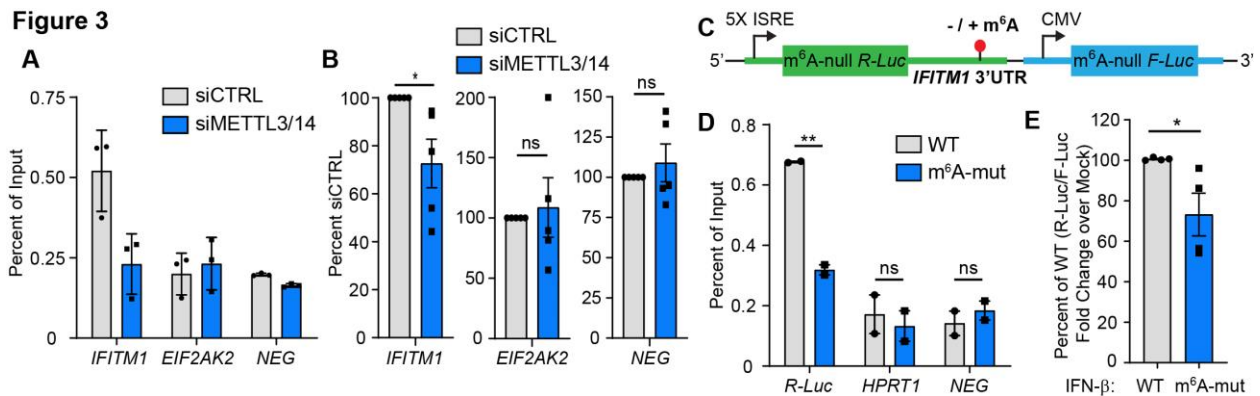

240

241 **Figure 3: m<sup>6</sup>A modification of the *IFITM1* 3' UTR enhances translation.** (A) Representative  
242 MeRIP-RT-qPCR analysis of relative m<sup>6</sup>A level of ISGs induced by IFN-β (8 h) in Huh7 cells  
243 treated with non-targeting control (siCTRL) or METTL3/14 siRNA and spiked-in m<sup>6</sup>A-negative  
244 (NEG) oligonucleotides. (B) Relative percent enrichment of each gene in (A), normalized to  
245 siCTRL, from 5 biological replicates. (C) Schematic of WT and mutant ISRE-m<sup>6</sup>A-null *Renilla*  
246 luciferase (*R-Luc*) *IFITM1* 3' UTR reporters that also express m<sup>6</sup>A-null firefly luciferase (*F-Luc*)  
247 from a separate promoter. (D) MeRIP-RT-qPCR analysis of relative m<sup>6</sup>A level of WT and m<sup>6</sup>A-  
248 mut *IFITM1* 3' UTR reporter RNA from transfected Huh7 cells treated with IFN-β (8 h). (E) Relative  
249 luciferase activity (*R-Luc*/*F-Luc*) in IFN-β induced (8 h, relative to mock) WT and m<sup>6</sup>A-mut *IFITM1*  
250 3' UTR reporters. Values are the mean ± SD of 3 technical replicates representative of 5 biological  
251 replicates (A); the mean ± SEM of 5 biological replicates (B); the mean ± SEM of 2 biological  
252 replicates (D), or mean ± SEM of 4 biological replicates (E). \* p < 0.05, \*\* p < 0.01 by unpaired  
253 Student's t test. ns = not significant.

254

255 Having confirmed that *IFITM1* is m<sup>6</sup>A modified, we next generated a luciferase reporter  
256 that contains an IFN-stimulated response element (ISRE) promoter-driven *Renilla* luciferase in  
257 which all DRAC motifs were ablated (m<sup>6</sup>A-null *R-Luc*) (Gokhale et al., 2019) fused to the wild type  
258 (WT) *IFITM1* 3' UTR, or an analogous 3' UTR sequence in which the four putative m<sup>6</sup>A motifs  
259 under the m<sup>6</sup>A peak in the 3' UTR in *IFITM1* were inactivated by A→G transitions (m<sup>6</sup>A-mut)  
260 (Figure 3C). These constructs also express a CMV promoter-driven m<sup>6</sup>A-null firefly luciferase  
261 gene as a control. The m<sup>6</sup>A modification status of the *IFITM1* 3' UTR reporter was first assessed  
262 using MeRIP-RT-qPCR after IFN-β treatment. The WT *IFITM1* 3' UTR reporter had increased

263 m<sup>6</sup>A modification compared to the m<sup>6</sup>A-mut *IFITM1* 3' UTR reporter, as well as the negative  
264 controls: *HPRT1*, which does not contain m<sup>6</sup>A (Wang et al., 2014), and an m<sup>6</sup>A-negative synthetic  
265 RNA control (Figure 3D). We next compared the production of the *Renilla* luciferase protein,  
266 relative to firefly luciferase, from the WT and m<sup>6</sup>A-mut *IFITM1* 3' UTR reporters by measuring  
267 luciferase activity. We found that the relative luciferase activity of the m<sup>6</sup>A-mut *IFITM1* 3'UTR  
268 reporter was significantly decreased following IFN- $\beta$  treatment compared to the WT *IFITM1* 3'  
269 UTR reporter (Figure 3E). Together, these data suggest that METTL3/14 regulates *IFITM1*  
270 translation through addition of m<sup>6</sup>A to the 3' UTR and that m<sup>6</sup>A within the *IFITM1* 3' UTR is  
271 sufficient to enhance its translation.

272

### 273 **YTHDF1 enhances *IFITM1* protein expression in an m<sup>6</sup>A-dependent fashion.**

274 The m<sup>6</sup>A binding protein YTHDF1 enhances translation of a number of m<sup>6</sup>A-modified  
275 genes (Wang et al., 2015). To test if YTHDF1 elicited the translation-promoting effects of m<sup>6</sup>A on  
276 ISGs, we stably overexpressed YTHDF1 (Y1<sup>OE</sup>) or an m<sup>6</sup>A binding-deficient YTHDF1 protein (Xu  
277 et al., 2015) (Y1mut<sup>OE</sup>) in Huh7 cells and measured the IFN-induced expression of ISGs 24 hours  
278 later. Overexpression of YTHDF1 was sufficient to increase *IFITM1* protein expression in  
279 response to IFN- $\beta$ , while overexpression of the m<sup>6</sup>A binding-deficient YTHDF1 protein (Y1mut<sup>OE</sup>)  
280 did not increase *IFITM1* abundance (Figure 4A-B). Importantly, wild-type and mutant YTHDF1  
281 overexpression did not significantly affect the levels of *IFITM1* mRNA following IFN- $\beta$  treatment,  
282 suggesting that YTHDF1 does not directly regulate IFN signaling or *IFITM1* mRNA stability (Figure  
283 4C). Neither the IFN-induced expression of the m<sup>6</sup>A-containing ISG *MX1*, nor the non-m<sup>6</sup>A  
284 containing ISGs *ISG15* and *EIF2AK2*, were significantly altered by YTHDF1 overexpression  
285 (Figure 4A-B). Interestingly, we found that WT YTHDF1 bound to the transcripts of *IFITM1*, *MX1*,  
286 *ISG15*, and the m<sup>6</sup>A-positive control *SON* (Wang et al., 2014), while the m<sup>6</sup>A-binding-defective  
287 YTHDF1 mutant protein did not. The non-m<sup>6</sup>A containing mRNAs *EIF2AK2* and *RPL30* (Wang et  
288 al., 2015) did not bind to either protein (Figure 4D-E). Together, these results reveal that YTHDF1  
289 binds to m<sup>6</sup>A on *IFITM1* and enhances its translation. The apparent m<sup>6</sup>A-dependent binding of  
290 YTHDF1 to *ISG15* suggests that *ISG15* is actually m<sup>6</sup>A-modified. In fact, plotting MeRIP-seq  
291 reads over input reads for *ISG15* did show a potential region of m<sup>6</sup>A enrichment in its 3' UTR  
292 (Figure 2E), although this was not identified as significant by two peak callers (Table S2). Taken  
293 together, these data suggest that YTHDF1 has transcript-specific roles in promoting translation,  
294 as it bound *IFITM1*, *MX1*, and *ISG15*, but its overexpression was only sufficient to significantly  
295 increase the protein production of *IFITM1*.

**Figure 4**

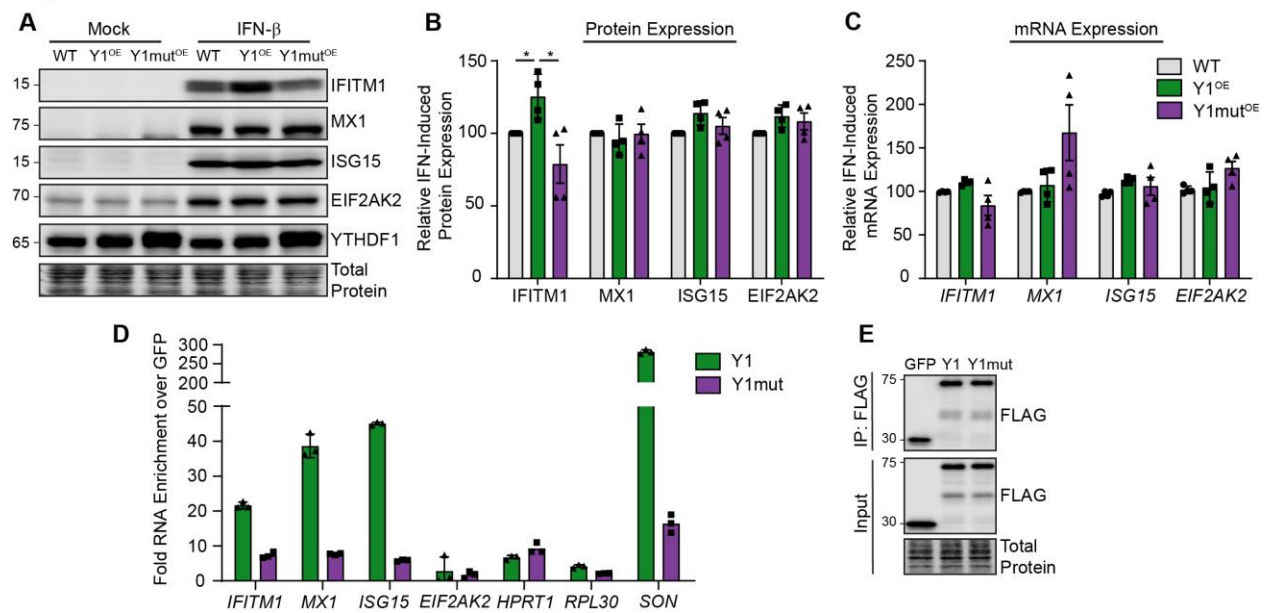

296

297 **Figure 4: YTHDF1 enhances IFITM1 protein expression in an m<sup>6</sup>A-dependent fashion. (A)**  
 298 Immunoblot analysis of extracts from Huh7 cells stably overexpressing FLAG-YTHDF1 WT (Y1<sup>OE</sup>)  
 299 or FLAG-YTHDF1 W465A (Xu et al., 2015) (Y1mut<sup>OE</sup>) following mock or IFN-β (24 h) treatment.  
 300 **(B)** Quantification of ISG expression following IFN-β from 3 independent experiments of (A),  
 301 normalized to total protein and graphed relative to siCTRL. **(C)** RT-qPCR analysis of ISG mRNA  
 302 expression normalized to HPRT1 in Huh7 cells stably overexpressing FLAG-YTHDF1 WT (Y1<sup>OE</sup>)  
 303 or W465A (Y1mut<sup>OE</sup>) after IFN-β (24 h) treatment **(D)** RT-qPCR analysis of enrichment of mRNAs  
 304 following immunoprecipitation of FLAG-YTHDF1 WT (Y1) or W465A (Mut) compared to FLAG-  
 305 GFP from Huh7 cells following IFN-β (8 h). IP values are normalized to input values and plotted  
 306 as fold enrichment over GFP. **(E)** Immunoblot of FLAG-immunoprecipitated and input fractions  
 307 used in (D). Values in (B-C) are the mean ± SEM of 3 biological replicates. \* p < 0.05, by Kruskal-  
 308 Wallis with Dunn's multiple comparisons test. Everything unlabeled was not significant with p >  
 309 0.05. Values in (D) are the mean ± SD of 3 technical replicates and are representative of 4  
 310 independent experiments.

311

### 312 **METTL3/14 and m<sup>6</sup>A promote the translation of a subset of ISGs.**

313 Having demonstrated that m<sup>6</sup>A supports the translation of two ISGs (*IFITM1* and *MX1*),  
 314 and that m<sup>6</sup>A is present on many ISGs, we next sought to identify additional ISGs whose protein  
 315 expression is regulated by METTL3/14. To this end, we employed quantitative mass  
 316 spectrometry-based proteomics with stable isotope labeling of amino acids (SILAC) to compare  
 317 the proteomes of siCTRL and siMETTL3/14 cells after IFN-β treatment (Table S3). The effect of  
 318 siMETTL3/14 compared to siCTRL on protein abundance is centered at a log ratio of 0 for the  
 319 majority of proteins (Figure S4A), demonstrating that METTL3/14 depletion does not have a global  
 320 effect on protein levels after IFN-β treatment. We determined which proteins are ISGs by defining

321 ISGs as genes upregulated >2-fold by IFN- $\beta$  treatment in our previous RNA-seq experiment  
322 (Table S1). While mass spectrometry detection of ISGs was limited (n=18), we did identify a  
323 number of METTL3/14-regulated ISGs (Figure 5A, MS). The protein expression of most of these  
324 ISGs was decreased following METTL3/14 depletion, and these ISGs included the previously  
325 identified m<sup>6</sup>A-modified IFITM1 (peptides corresponding to IFITM1/2/3) and MX1, as well as  
326 additional antiviral ISGs such as OAS2 and the different HLA-C chains (Figure 5A), which are  
327 also m<sup>6</sup>A-modified. We also compared these data to our previous RNA-seq experiment (Table  
328 S1) to determine whether the effects of METTL3/14 on the protein level of these ISGs is  
329 determined by regulation of their mRNA expression. Importantly, following METTL3/14 depletion,  
330 the ISGs in this experiment that were decreased at the protein level did not also have a decrease  
331 in mRNA abundance, suggesting they may be regulated at the translation level, as our earlier  
332 polysome profiling indicated for IFITM1 and MX1 (Figure 1C-D; 5A, RNA). We note that not all  
333 m<sup>6</sup>A-modified ISGs identified by mass spectrometry were regulated by METTL3/14 depletion  
334 (Figure 5A, m<sup>6</sup>A). This suggests that METTL3/14 and m<sup>6</sup>A regulate a subset of ISGs and support  
335 their protein expression.

336 As a complementary approach, we also used Ribo-seq to more broadly define the role of  
337 METTL3/14 in translational regulation of ISGs (Table S4). As ribosome profiling relies on digestion  
338 of mRNA that is not ribosome-bound, we first confirmed that reads in the untranslated regions  
339 were depleted (Figure S4B). Then we analyzed the top 100 most highly-induced ISGs (Table S1)  
340 that were actively translated (base mean >25) and compared the effect of METTL3/14 depletion  
341 on ribosome density (Ribo) to mRNA abundance from our previous RNA-seq analysis (RNA)  
342 (Figure 5B; Figure S4C; Table S1). METTL3/14 depletion overall appeared to result in decreased  
343 ribosome occupancy among many of these ISGs (66/100, including *IFITM1*), without having any  
344 generalized effect on their mRNA abundance (Figure S4C). In many cases, METTL3/14 depletion  
345 affected both the mRNA abundance and ribosome protection of individual ISGs similarly (Figure  
346 5B, Quadrants I and III). However, for roughly a third of these genes (33/100), METTL3/14  
347 depletion resulted in decreased ribosome protection, despite greater mRNA abundance (Figure  
348 5B, Quadrant IV). Alternatively, very few (4/100) ISGs had both increased ribosome protection  
349 and decreased mRNA abundance following METTL3/14 depletion (Figure 5B, Quadrant II). We  
350 note that, of these 100 ISGs, 85 were m<sup>6</sup>A-modified, roughly consistent with the 74% of genes  
351 that we had identified in the total expressed transcriptome as containing m<sup>6</sup>A (Table S2).  
352 Interestingly, a number of m<sup>6</sup>A-modified ISGs were not regulated by METTL3/14, as measured  
353 by ribosome protection or mRNA abundance, supporting a role for METTL3/14 and m<sup>6</sup>A in  
354 regulation of only certain ISGs. These data, taken together with our quantitative mass

355 spectrometry and RNA-seq analysis, suggest that METTL3/14 regulates the translation of a  
 356 subset of ISGs to support their protein expression during the type I IFN response.

357

**Figure 5**

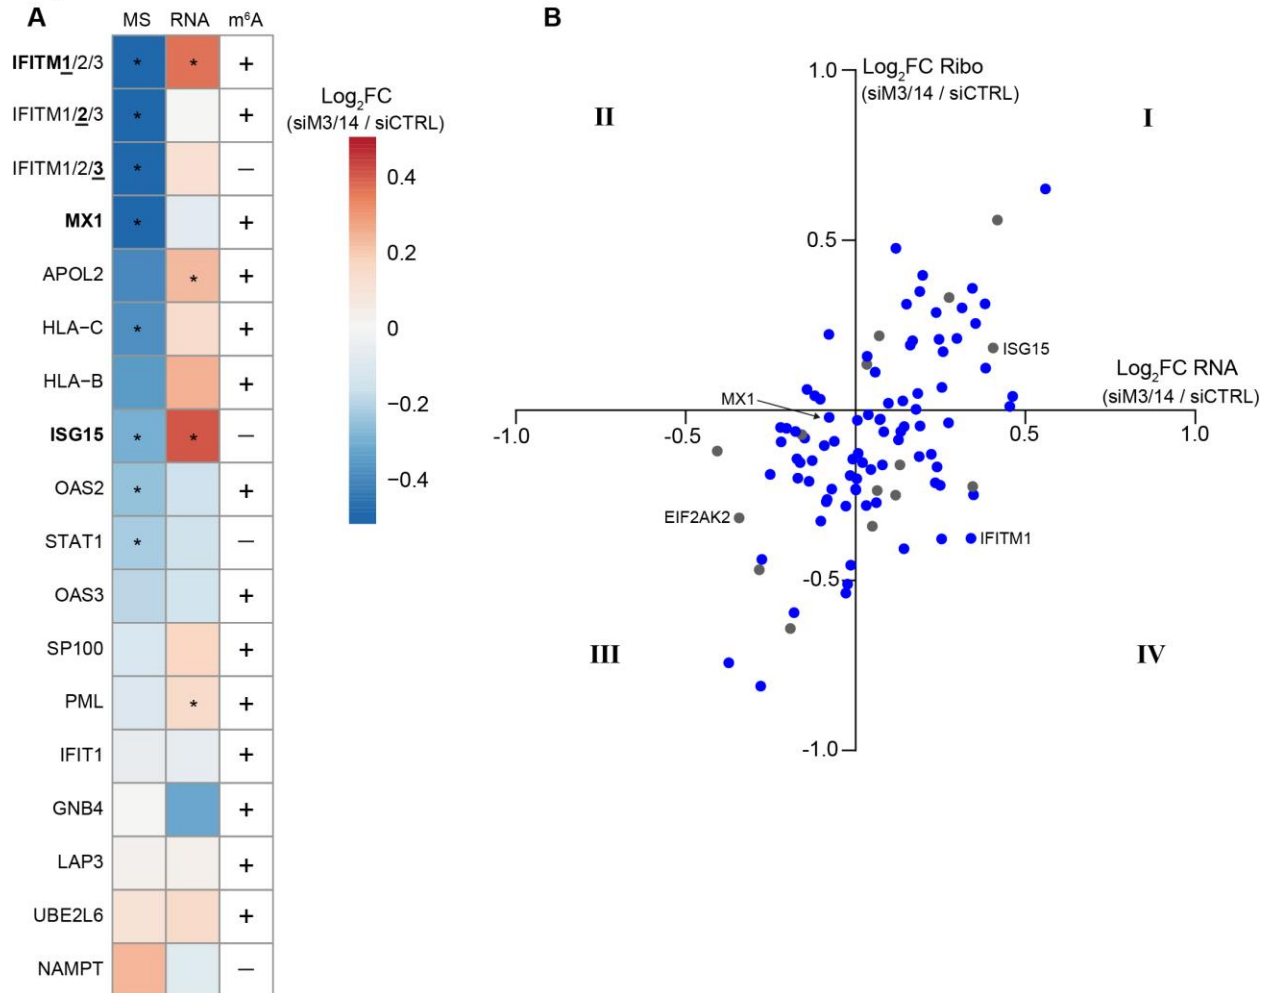

358

359

360 **Figure 5: METTL3/14 regulates the translation of a subset of ISGs.** (A) 3-column heatmap  
 361 shows the effect of METTL3/14 depletion on the expression of ISGs in Huh7 cells following IFN-  
 362 β treatment. The first column shows the log<sub>2</sub> fold change of protein estimates from quantitative  
 363 mass spectrometry (siMETTL3/14 over siCTRL + IFN-β 24 h; n=2 biological replicates). The  
 364 second column shows log<sub>2</sub> fold change of mRNA reads from an independent RNA-seq  
 365 experiment (siMETTL3/14 over siCTRL + IFN-β 8 h; n=3 biological replicates), and the third  
 366 column indicates m<sup>6</sup>A status (+ indicates m<sup>6</sup>A-positive; - indicates m<sup>6</sup>A-negative) from MeRIP-  
 367 seq (+ IFN-β 8 h; n=3 biological replicates). Genes include any ISGs induced more than 2-fold  
 368 by IFN from RNA-seq that were also detected by mass spectrometry. ISGs investigated in other  
 369 figures are shown in bold. Because IFITM1/2/3 are similar, we used this notation to indicate  
 370 peptides detected from this family of proteins; however, RNA-seq fold change and m<sup>6</sup>A status  
 371 correspond to the underlined number. \* adjusted P < 0.05. (B) Four-quadrant scatterplot

372 showing the effect of METTL3/14 on the expression of ISGs. The y-axis is the log<sub>2</sub> fold change  
373 of ribosome protected fragments from Ribo-seq (siMETTL3/14 over siCTRL), and the x-axis is  
374 the log<sub>2</sub> fold change of mRNA reads from an independent RNA-seq experiment (siMETTL3/14  
375 over siCTRL). m<sup>6</sup>A-modified (blue) or m<sup>6</sup>A-negative (gray) genes are noted. ISGs investigated in  
376 other figures are labeled. See also Figure S4.

377

### 378 **METTL3/14 augments the antiviral effects of the IFN response.**

379 The fact that METTL3/14 enhances the expression of a subset of ISGs during the type I  
380 IFN response suggests that METTL3/14 could be required for an optimal antiviral response. To  
381 determine whether METTL3/14 contributes to viral restriction by type I IFN, we measured the  
382 ability of type I IFN to restrict infection by the negative-sense stranded RNA virus, vesicular  
383 stomatitis virus (VSV), following METTL3/14 perturbation. The VSV genome contains the m<sup>6</sup>A<sub>m</sub>  
384 cap modification, but as the deposition of this modification is not controlled by METTL3/14  
385 (Boulias et al., 2019; Ogino and Banerjee, 2011; Sendinc et al., 2019), we would not expect VSV  
386 replication to be directly affected by changes in the levels of METTL3/14. Rather, any impact on  
387 VSV replication would likely be mediated by methylation of host factors. We perturbed the  
388 expression of METTL3/14 using siRNAs or by overexpression and then determined the percent  
389 of cells infected by VSV at 6 hours post-infection in the presence and absence of a low dose of  
390 IFN-β pretreatment (6 hours; 25 U/mL). Measuring VSV infection at early time points after  
391 infection allowed us to measure viral replication prior to cellular upregulation of ISGs induced  
392 directly in response to infection. Indeed, in the absence of IFN-β pretreatment, we saw no  
393 induction of ISGs by VSV in any condition (Figure 6A-B). Additionally, as anticipated, we found  
394 that the replication of VSV, as measured by immunoblotting or quantifying the percent of cells  
395 infected, was not altered by depletion or overexpression of METTL3/14 in cells in the absence of  
396 IFN-β pretreatment (Figure 6). As observed earlier, following IFN-β pretreatment, METTL3/14  
397 depletion led to decreased expression of METTL3/14-regulated ISGs (Figure 6A), while  
398 METTL3/14 overexpression increased the expression of these ISGs (Figure 6B). As expected,  
399 IFN-β pretreatment resulted in overall less replication of VSV, as IFN-β is known to inhibit VSV  
400 replication (Muller et al., 1994) (Figure 6). However, upon depletion of METTL3/14, the ability of  
401 IFN-β to restrict VSV was reduced (Figure 6A, 6C). Conversely, METTL3/14 overexpression  
402 enhanced IFN-mediated restriction of VSV (Figure 6B, 6D). These data indicate that METTL3/14  
403 enhances the antiviral properties of type I IFN and is required for an efficient IFN-mediated  
404 antiviral response.

405

**Figure 6**

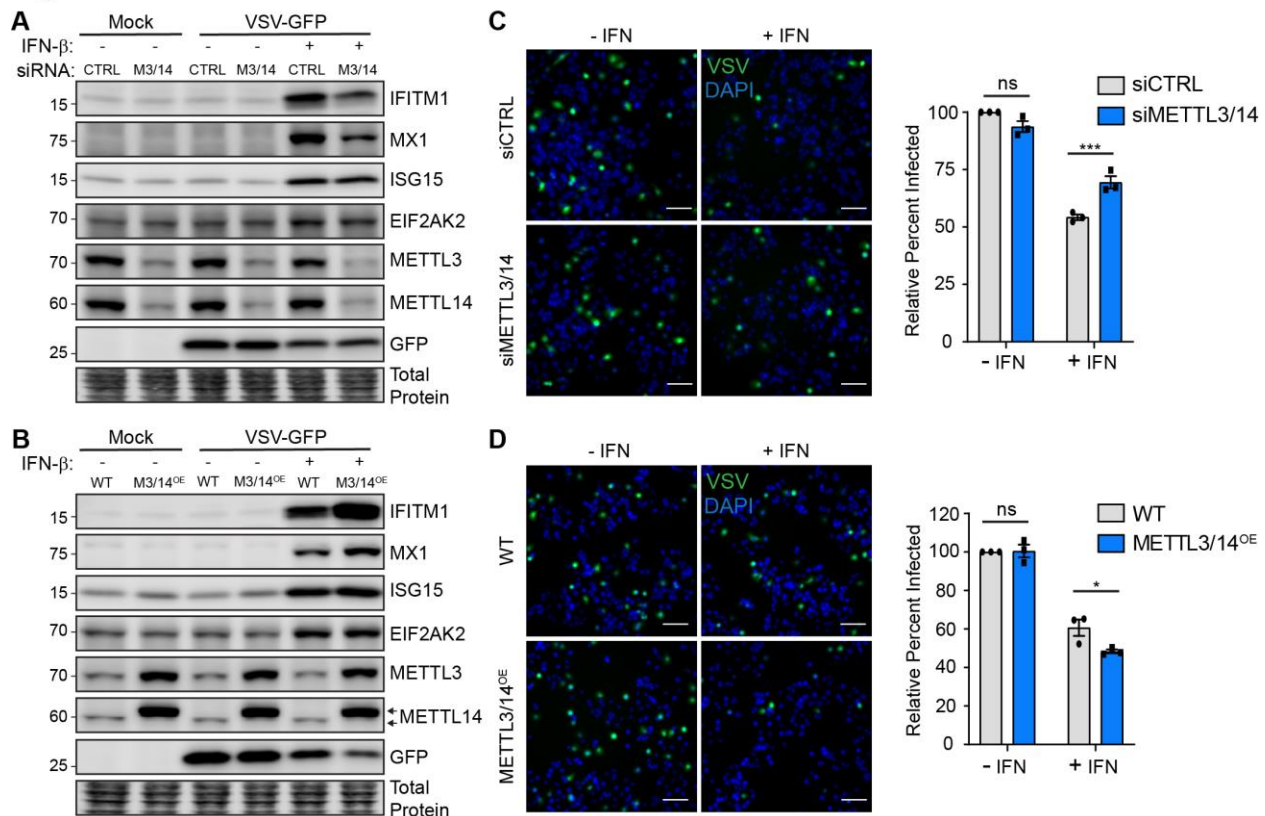

406

407

408 **Figure 6: METTL3/14 augments the antiviral effects of the type I IFN response. (A, B)**  
 409 Representative immunoblot analysis (n=3) of extracts from Huh7 cells transfected with siRNAs  
 410 (A) or stably overexpressing FLAG-METTL14, which also enhances METTL3 expression  
 411 (M3/14<sup>OE</sup>); (B), then treated with IFN- $\beta$  (6 h) or mock, followed by infection with VSV (MOI=2; 6  
 412 h). Arrows denote FLAG-METTL14 (top) and endogenous METLL14 (bottom). (C, D)  
 413 Representative micrographs of Huh7 cells treated with non-targeting control (siCTRL) or  
 414 METTL3/14 siRNA (C) or stably overexpressing FLAG-METTL14 (METTL3/14<sup>OE</sup>; D), that were  
 415 pre-treated with IFN- $\beta$  (6 h), and then infected with VSV (MOI=2; 6 h), with quantification of  
 416 percent of cells infected from 3 independent experiments with 5 fields per condition, with >150  
 417 cells per field, normalized to siCTRL or WT with no IFN treatment, shown on the right. Scale Bar,  
 418 100  $\mu$ m. Values are the mean  $\pm$  SEM of 3 biological replicates. \*  $p < 0.05$ , \*\*\*  $p < 0.001$  by 2-way  
 419 ANOVA with Sidak's multiple comparisons test. ns = not significant.

420

## 421 Discussion

422 Post-transcriptional control of the type I IFN response remains poorly understood, and  
 423 most of our existing knowledge centers around miRNA-mediated regulation of the IFN-induced  
 424 JAK-STAT signaling pathway (Forster et al., 2015) or a few examples of alternative splicing of  
 425 ISG transcripts (West et al., 2019). While a number of reports have documented non-canonical



426 activation or delayed stimulation of subsets of ISGs during viral infection, the molecular pathways  
427 that can control these subsets of ISGs are not well understood (Pulit-Penalzo et al., 2012; Rose  
428 et al., 2010). However, a number of studies have identified transcriptional regulators of subsets  
429 of ISGs (Froggatt et al., 2019; Perwitasari et al., 2011; Seifert et al., 2019), and the mRNA Cap1  
430 methyltransferase CMTR1 was recently shown to regulate the expression of certain ISGs  
431 (Williams et al., 2020). These studies demonstrate the complexity of regulation of expression of  
432 ISGs that extends beyond transcriptional induction of ISGs from signaling of the JAK-STAT  
433 pathway. Here, we identify a novel post-transcriptional regulatory mechanism for the expression  
434 of a subset of antiviral ISGs. We found that the m<sup>6</sup>A methyltransferase complex of METTL3/14  
435 methylates certain antiviral ISGs to facilitate their translation to promote an antiviral cellular state.

436 The transcript-specific effects of m<sup>6</sup>A can modulate gene expression to coordinate cellular  
437 responses. Indeed, we found that the presence of m<sup>6</sup>A on ISGs can elicit different mechanisms  
438 of post-transcriptional regulation. For *IFITM1*, m<sup>6</sup>A in the 3' UTR led to an increase in its  
439 translation, via METTL3/14 and the reader protein YTHDF1. Consistent with our results, previous  
440 reports have shown that 3' UTR m<sup>6</sup>A modification enhances translation initiation and that YTHDF1  
441 likely mediates this enhancement by recruiting eIF3 to m<sup>6</sup>A-modified mRNAs (Wang et al., 2015).  
442 Interestingly, while the m<sup>6</sup>A-modified *MX1* is also upregulated at the protein level by METTL3/14,  
443 YTHDF1 overexpression was not sufficient to elicit this upregulation. This may indicate that *MX1*  
444 requires other factors or additional readers to enhance its expression. Indeed, YTHDF3 has  
445 recently been shown to have roles in promoting translation of m<sup>6</sup>A-modified genes, perhaps by its  
446 interaction with proteins of the 40S and 60S ribosomal subunits (Li et al., 2017; Shi et al., 2017),  
447 and YTHDC2 can recognize m<sup>6</sup>A within coding sequence to enhance translation (Mao et al.,  
448 2019). Of note, others have found that YTHDF3 inhibits ISG production in murine models through  
449 its enhancement of *FOXO3* translation, although this apparently occurred independently of m<sup>6</sup>A  
450 (Zhang et al., 2019b). Therefore, m<sup>6</sup>A and its related proteins can regulate ISG expression  
451 through a variety of mechanisms. Indeed, only a subset of our identified m<sup>6</sup>A-modified ISGs were  
452 translationally enhanced by METTL3/14, as shown by a combination of Ribo-seq, quantitative  
453 mass spectrometry, and RNA-seq (Figure 5). As m<sup>6</sup>A has multiple functions in mRNA metabolism,  
454 it is possible that m<sup>6</sup>A affects processes other than translation for these other modified ISGs, for  
455 example by modulating their splicing, nuclear export, secondary structure, or stability (Liu et al.,  
456 2019a). Indeed, it is likely that *ISG15* mRNA stability is regulated by m<sup>6</sup>A, as we found that this  
457 transcript is bound by YTHDF1, appears to have an m<sup>6</sup>A site in its 3' UTR, and its mRNA levels  
458 are increased following METTL3/14 depletion. m<sup>6</sup>A may also regulate mRNA trafficking or

459 turnover of ISGs at later timepoints after IFN stimulation or may contribute to alternative splicing  
460 of antiviral genes in response to IFN.

461         Disentangling the regulatory effects of m<sup>6</sup>A on viral infection has been challenging, as both  
462 viral and host transcripts contain m<sup>6</sup>A (Williams et al., 2019). Recent work by our group and others  
463 revealed that m<sup>6</sup>A regulates several aspects of the host response to infection (Gokhale et al.,  
464 2019; Rubio et al., 2018; Winkler et al., 2019). For example, when the *IFNB1* transcript is induced,  
465 which can occur in response to viral infection, it is modified by m<sup>6</sup>A, and this destabilizes the  
466 transcript. This regulation of *IFNB1* may serve as an intrinsic mechanism to dampen and control  
467 the innate immune response (Rubio et al., 2018; Winkler et al., 2019). Interestingly, HCMV  
468 appears to hijack this arm of immune regulation by upregulating METTL3/14 expression to  
469 increase m<sup>6</sup>A on *IFNB1*, which ultimately decreases IFN- $\beta$  production, resulting in enhanced viral  
470 replication (Rubio et al., 2018; Winkler et al., 2019). However, in our work, by directly stimulating  
471 ISGs with IFN- $\beta$ , we reveal additional m<sup>6</sup>A-mediated regulation of certain ISGs downstream of  
472 IFN- $\beta$  production. Specifically, we show that METTL3/14 depletion reduces the ability of IFN to  
473 restrict VSV infection, while METTL3/14 overexpression enhances the ability of IFN to inhibit VSV  
474 infection (Figure 6). Importantly, as VSV replication was not affected by changes in METTL3/14  
475 expression in the absence of IFN, this suggests that the differential ability of IFN to restrict VSV  
476 following perturbation of METTL3/14 expression is not mediated by direct regulation of the viral  
477 RNA (Figure 6). Rather, these data support the idea that METTL3/14 augments the antiviral  
478 response by enhancing the production of ISGs. Identifying the factors that control m<sup>6</sup>A addition to  
479 a specific subset of ISGs will be an important future pursuit and may clarify why only a subset of  
480 these antiviral genes become methylated. Many type I IFN-stimulated genes are also induced by  
481 type II (IFN- $\gamma$ ) and type III (IFN- $\lambda$ ) IFNs. Future studies may uncover whether signaling  
482 downstream of these IFN families also leads to similar m<sup>6</sup>A-mediated modulation of ISG  
483 expression. Additionally, exploring whether viruses employ strategies to counter METTL3/14-  
484 mediated enhancement of ISGs will shed further light on the interplay between viral and host RNA  
485 processes and how RNA modifications regulate these processes.

486         In addition to regulating type I IFN pathways, m<sup>6</sup>A tunes other cellular responses to viral  
487 infection. We recently showed changes to the m<sup>6</sup>A status of certain host transcripts in response  
488 to infection by *Flaviviridae*. Further, we found that many of these m<sup>6</sup>A-altered genes regulate  
489 *Flaviviridae* infection (Gokhale et al., 2019). Some of the alterations in m<sup>6</sup>A during infection were  
490 driven by innate immune sensing pathways, revealing that innate immune activation can affect  
491 cellular m<sup>6</sup>A distribution during infection. Others have recently shown that VSV infection impairs  
492 the demethylase activity of ALKBH5, resulting in increased m<sup>6</sup>A modification and destabilization

493 of the *OGDH* transcript. This resulted in less production of the metabolite itaconate, which  
494 appeared to be required for VSV replication (Liu et al., 2019b). While these effects of m<sup>6</sup>A on VSV  
495 replication occurred independently of IFN signaling, our work revealed that m<sup>6</sup>A can also inhibit  
496 VSV replication by promoting ISG expression during IFN signaling. While we did not find an effect  
497 of m<sup>6</sup>A on VSV replication in the absence of IFN signaling, as described above (Liu et al., 2019b),  
498 we did not investigate a role for ALKBH5. Taken together, our findings add to the knowledge of  
499 the diverse regulatory functions of m<sup>6</sup>A during host-pathogen interactions.

500 In summary, we reveal a subset of ISGs that are post-transcriptionally regulated by  
501 METTL3/14 through m<sup>6</sup>A modification. Additionally, we show that the translation of these ISGs is  
502 enhanced by m<sup>6</sup>A and postulate that m<sup>6</sup>A may be utilized during the IFN response as a strategy  
503 for efficient production of antiviral proteins and the establishment of an antiviral cellular state.  
504 Together, these data provide a new molecular understanding of type I IFN response regulation  
505 that will ultimately broaden our understanding of innate immunity and host-pathogen interactions.  
506 In addition to their functions in antiviral innate immunity, ISGs are also known to regulate  
507 inflammation and cell death and recent reports have discovered roles for ISGs in cancer and  
508 embryonic development (Buchrieser et al., 2019; Cheon et al., 2014; Yockey and Iwasaki, 2018).  
509 Therefore, characterizing the molecular mechanisms that govern ISG expression will be essential  
510 for understanding their dysregulation and this information could be harnessed to develop  
511 therapeutics to alter ISG expression, which will be relevant to multiple diseases.

512

### 513 **Acknowledgements**

514 We thank colleagues who provided reagents (see Methods), New England Biolabs for the gift of  
515 anti-m<sup>6</sup>A antibodies, the Duke Functional Genomics Core Facility, the Duke Center for Genomic  
516 and Computational Biology Core, the Epigenomics Core and the Scientific Computing Unit at  
517 Weill Cornell, and Horner lab members for manuscript discussion. This work was supported by  
518 funds from Burroughs Wellcome Fund (S.M.H.) and National Institutes of Health: R01AI125416,  
519 R21AI129851 (S.M.H. and C.E.M.), R01MH117406 (C.E.M.), T32-CA009111 (M.J.M.), R01-  
520 GM127802 (B.X.). Other funding sources include: National Science and Engineering Research  
521 Council of Canada (A.B.R.M. PGS-D funding), American Heart Association (N.S.G. Pre-doctoral  
522 Fellowship, 17PRE33670017), National Institute of General Medical Sciences of the National  
523 Institutes of Health Medical Scientist Training Program grant to the Weill  
524 Cornell/Rockefeller/Sloan Kettering Tri-Institutional MD-PhD Program. (H.M. T32GM007739),  
525 Bert L. and N. Kuggie Vallee Foundation, WorldQuant Foundation, Pershing Square Sohn  
526 Cancer Research Alliance, NASA (NNX14AH50G).

527

## 528 **Author contributions**

529           Conceptualization: M.J.M. and S.M.H. Investigation: M.J.M., N.S.G., and H.I. Formal  
530 analysis: M.J.M., A.B.R.M., H.M., N.S.A., and. Software: A.B.R.M., H.M., N.S.A. Writing – original  
531 draft: M.J.M. and S.M.H. Writing – review and editing: M.J.M., A.B.R.M., H.M., N.S.A., N.S.G.,  
532 B.X., C.E.M., and S.M.H. Funding acquisition: M.J.M., A.B.R.M., N.S.G., B.X., C.E.M., and S.M.H.

533

## 534 **Competing interests**

535           C.E.M. is a cofounder and board member for Biotia and Onegevity Health, and an advisor  
536 or compensated speaker for Abbvie, Acuamark Diagnostics, ArcBio, Bio-Rad, DNA Genotek,  
537 Genialis, Genpro, Illumina, New England Biolabs, QIAGEN, Whole Biome, and Zymo Research.

538

## 539 **Methods**

540 **Cell Lines.** Human hepatoma Huh7 cells, lung carcinoma A549 cells, neonatal human dermal  
541 fibroblast (NHDF) cells, Vero cells, and embryonic kidney 293T cells were grown in Dulbecco's  
542 modification of Eagle's medium (DMEM; Mediatech) supplemented with 10% fetal bovine serum  
543 (Thermo Fisher Scientific), 1X minimum essential medium non-essential amino acids (Thermo  
544 Fisher Scientific), and 25 mM HEPES (Thermo Fisher Scientific) (cDMEM). The identity of the  
545 Huh7 cells used in this study was verified by using the GenePrint STR kit (Promega) (DNA  
546 Analysis Facility, Duke University, Durham, NC, USA). A549 cells, 293T, and Vero cells (CCL-  
547 185, CRL-3216, and CCL-81) were obtained from American Type Culture Collection (ATCC),  
548 NHDF cells (CC-2509) were obtained from Lonza, and Huh7 cells were a gift of Dr. Michael Gale.  
549 All cell lines were verified as mycoplasma free by the LookOut Mycoplasma PCR detection kit  
550 (Sigma).

551

552 **IFN- $\beta$  Treatment.** All IFN- $\beta$  (PBL Assay Science) treatments were performed at a concentration  
553 of 50 units/mL in cDMEM, unless otherwise noted.

554

555 **VSV Infection.** GFP-expressing VSV (Whelan et al., 2000) was obtained from Dr. Sean Whelan  
556 and propagated by infecting Vero cells grown in cDMEM for 48 hours, after which infectious  
557 supernatant was harvested and cleared by centrifugation (1,000 X g for 10 minutes at 4°C) and  
558 frozen at -80°C prior to titering. To determine the titer of viral stocks, confluent Vero cells were  
559 inoculated with serial dilutions of VSV in serum-free DMEM for 2 hours, overlaid with cDMEM  
560 containing 2% SeaPlaque Agarose (Lonza), and incubated at 37°C for an additional 24 hours.

561 Cells were then fixed using 4% formaldehyde and visualized to count GFP-expressing plaques  
562 and calculate plaque forming units/mL. Experimental VSV infections were performed at a  
563 multiplicity of infection of 2 in serum-free DMEM for 1.5 h, after which cDMEM was replenished.  
564 Cells were fixed in 4% formaldehyde, washed with PBS, and stained for DAPI (4',6-diamidino-2-  
565 phenylindole) (Life Technologies, 1:1000). For each condition, 5 images were acquired at 10X  
566 magnification on a Zeiss Axio Observer Z1 microscope, and images were processed using ZEN  
567 2 (Zeiss). The percent of cells infected was calculated by counting the number of GFP-positive  
568 cells / the number of nuclei (DAPI).

569  
570 **Plasmids.** These plasmids have been described previously: pLEX-FLAG-YTHDF1 (Kennedy et  
571 al., 2016), psiCheck2-m<sup>6</sup>A-null (Gokhale et al., 2019), psPAX2 (Addgene plasmid #12260;  
572 RRID:Addgene\_12260), and pMD2.G (Addgene plasmid # 12259; RRID:Addgene\_12259). The  
573 following plasmids were constructed in this study: pLEX-FLAG-METTL14, pLEX-FLAG-YTHDF1  
574 W465A, and psiCheck2-m<sup>6</sup>A-null-ISRE-*IFITM1* 3' UTR reporter (wild-type and m<sup>6</sup>A-mut). pLEX-  
575 FLAG-METTL14 was generated by cloning the PCR-amplified FLAG-tagged METTL14 coding  
576 sequence into the BamHI and XhoI restriction sites of the pLEX expression vector. pLEX-FLAG-  
577 YTHDF1 W465A was generated by site-directed mutagenesis of pLEX-FLAG-YTHDF1. WT and  
578 m<sup>6</sup>A-mut *IFITM1* 3' UTR reporter plasmids (psiCheck2-m<sup>6</sup>A-null-ISRE-*IFITM1* 3' UTR reporter)  
579 were generated by inserting either wild-type *IFITM1* 3' UTR cDNA or *IFITM1* 3' UTR cDNA with  
580 4 A-to-G mutations at potential m<sup>6</sup>A sites (obtained as IDT gBlocks) into the XhoI and NotI  
581 restriction sites of psiCheck2-m<sup>6</sup>A-null (Gokhale et al., 2019). The 5X ISRE promoter was PCR-  
582 amplified from pISREluc (Sumpter et al., 2005) then inserted into the KpnI and NheI sites. All DNA  
583 sequences were verified by sequencing.

584  
585 **Transfection.** siRNAs directed against METTL3 (SI04317096), METTL14 (SI00459942), or non-  
586 targeting AllStars negative control siRNA (1027280) were purchased from Qiagen. All siRNA  
587 transfections were performed using the Lipofectamine RNAiMax reagent (Invitrogen), according  
588 to manufacturer's instructions. siMETTL3/14 co-transfections were performed at a ratio of 1:2  
589 siMETTL3:siMETTL14. Huh7 and A549 cells were transfected with 25 pmol of siRNA at a final  
590 concentration of 0.0125  $\mu$ M, and NHDF cells were transfected with 250 pmol of siRNA at a final  
591 concentration of 0.25  $\mu$ M. Media was changed 4 hours post-transfection, and cells were incubated  
592 for 36 h post-transfection prior to each experimental treatment. Plasmid transfections of *IFITM1*  
593 3' UTR reporter plasmids (500 ng per single well of a 6-well plate) were performed using the  
594 FuGENE 6 (Promega), according to manufacturer's instructions.

595

596 **Generation of Overexpression Cell Lines.** Lentiviral particles were generated by harvesting  
597 supernatant 72 h post-transfection of 293T cells with pLEX-FLAG-METTL14, pLEX-FLAG-  
598 YTHDF1, or pLEX-FLAG-YTHDF1 W465A, and the packaging plasmids psPAX2 and pMD2.G  
599 (provided by Duke Functional Genomics Facility). This supernatant was then used to transduce  
600 Huh7 cells for 48 hours. Following transduction, cells were selected in 2 µg/mL puromycin (Sigma)  
601 for 48 hours and then single cell colonies were isolated. Overexpression of FLAG-tagged proteins  
602 in selected colonies was verified by immunoblotting, and we also verified that METTL14  
603 overexpression stabilized METTL3 (Ping et al., 2014), creating METTL3/14 overexpression cell  
604 lines. These clones were maintained in cDMEM containing 1 µg/mL puromycin.

605

606 **Immunoblotting.** Cells were lysed in a modified radioimmunoprecipitation assay (RIPA) buffer  
607 (10 mM Tris [pH 7.5], 150 mM NaCl, 0.5% sodium deoxycholate, and 1% Triton X-100)  
608 supplemented with protease inhibitor cocktail (Sigma) and phosphatase inhibitor cocktail II  
609 (Millipore), and post-nuclear lysates were harvested by centrifugation. Quantified protein  
610 (between 5 and 15 µg) was added to a 4X SDS protein sample buffer (40% glycerol, 240 mM  
611 Tris-HCl [pH 6.8], 8% SDS, 0.04% bromophenol blue, 5% beta-mercaptoethanol), resolved by  
612 SDS/PAGE, and transferred to nitrocellulose membranes in a 25 mM Tris-192 mM glycine-0.01%  
613 SDS buffer. Membranes were stained with Revert 700 total protein stain (LI-COR Biosciences),  
614 then blocked in 3% bovine serum albumin. Membranes were incubated with primary antibodies  
615 for 2 hours at room temperature or overnight at 4°C. After washing with PBS-T buffer (1× PBS,  
616 0.05% Tween 20), membranes were incubated with species-specific horseradish peroxidase-  
617 conjugated antibodies (Jackson ImmunoResearch, 1:5000) for 1 hour at room temperature,  
618 followed by treatment of the membrane with Clarity enhanced chemiluminescence (Bio-Rad) and  
619 imaging on an Odyssey Fc imaging system (LI-COR Biosciences). The following antibodies were  
620 used for immunoblotting: mouse anti-IFITM1 (Proteintech 60074-1-Ig, 1:1000; recognizes IFITM1  
621 but not IFITM2 or IFITM3 (Shi et al., 2018; Xie et al., 2015)), rabbit anti-MX1 (Abcam ab207414,  
622 1:1000), mouse anti-ISG15 (Santa Cruz sc-166755, 1:5000), rabbit anti-EIF2AK2 (Abcam  
623 ab32506, 1:1000), rabbit anti-METTL14 (Sigma HPA038002, 1:2500), mouse anti-METTL3  
624 (Abnova H00056339-B01P, 1:1000), rabbit anti-YTHDF1 (Proteintech 17479-1-AP, 1:1000),  
625 mouse anti-FLAG-HRP (Sigma A8592, 1:5000), rabbit anti-GFP (Thermo Fisher Scientific A-  
626 11122, 1:1000).

627

628 **Quantification of Immunoblots.** Following imaging using the LI-COR Odyssey Fc, immunoblots  
629 were quantified using ImageStudio Lite software, and raw values were normalized to total protein  
630 (Revert 700 total protein stain) for each condition.

631  
632 **MeRIP-seq and Analysis.** Following mock or IFN- $\beta$  treatment of Huh7 cells for 8 hours, cellular  
633 RNA was harvested using TRIzol (Thermo Fisher Scientific), polyA-tailed mRNA was selected  
634 using the Dynabeads mRNA Purification kit (Thermo Fisher Scientific), and MeRIP-seq was  
635 performed using the NEB EpiMark m<sup>6</sup>A-enrichment kit as previously described (Gokhale et al.,  
636 2019) with the following modifications. Briefly, 25 mL Protein G Dynabeads (Thermo Fisher) per  
637 sample were washed three times in MeRIP buffer (150 mM NaCl, 10 mM Tris-HCl [pH 7.5], 0.1%  
638 NP-40), and incubated with 1 mL anti-m<sup>6</sup>A antibody for 2 h at 4C with rotation. After washing  
639 three times with MeRIP buffer, anti-m<sup>6</sup>A conjugated beads were incubated with purified mRNA  
640 with rotation at 4C overnight in 300 mL MeRIP buffer with 1 mL RNase inhibitor (recombinant  
641 RNasin; Promega). 10% of the mRNA sample was saved as the input fraction. Beads were then  
642 washed twice with 500 mL MeRIP buffer, twice with low salt wash buffer (50 mM NaCl, 10 mM  
643 Tris-HCl [pH 7.5], 0.1% NP-40), twice with high salt wash buffer (500 mM NaCl, 10 mM Tris-HCl  
644 [pH 7.5], 0.1% NP-40), and once again with MeRIP buffer. m<sup>6</sup>A-modified RNA was eluted twice  
645 in 100 mL of MeRIP buffer containing 5 mM m<sup>6</sup>A salt (Santa Cruz Biotechnology) for 30 min at  
646 4C with rotation. Eluates were pooled and concentrated by ethanol purification. RNA-seq libraries  
647 were prepared from both eluate and 10% input mRNA using the TruSeq mRNA library prep kit  
648 (Illumina), subjected to quality control (MultiQC), and sequenced on the HiSeq 4000 instrument.  
649 Reads were trimmed using Trimmomatic (Bolger et al., 2014) and aligned to the hg38 genome  
650 using the splice-aware STAR aligner (Dobin et al., 2013). Changes in gene expression between  
651 Mock and IFN- $\beta$  treated samples were then identified using DESeq2 (Love et al., 2014) based on  
652 differences in read counts from featureCounts (Liao et al., 2014) and plotted in Figure S2A. m<sup>6</sup>A  
653 peaks were identified in IFN- $\beta$  treated samples using the MeTDiff peak caller (Cui et al., 2018)  
654 and additionally with meRIPPer (<https://sourceforge.net/projects/meripper/>). Presented data are  
655 from MeTDiff analysis unless otherwise noted. Raw data from Winkler et al. (Winkler et al., 2019)  
656 and Rubio et al. (Rubio et al., 2018) were similarly processed (Figure S2B). Coverage plots were  
657 generated using CovFuzze (Imam et al., 2018) and a metagene plot for peak locations produced  
658 as previously described (Gokhale et al., 2019). Motif enrichment was calculated using HOMER  
659 (Heinz et al., 2010). Full methods and scripts for data processing are open-source and online on  
660 GitHub ([https://github.com/al-mcintyre/merip\\_reanalysis\\_scripts](https://github.com/al-mcintyre/merip_reanalysis_scripts)) (McIntyre et al., 2020).

661

662 **RT-qPCR.** Total cellular RNA was extracted using the Qiagen RNeasy kit (Life Technologies) or  
663 TRIzol extraction (Thermo Fisher Scientific). RNA was then reverse transcribed using the iScript  
664 cDNA synthesis kit (Bio-Rad) as per the manufacturer's instructions. The resulting cDNA was  
665 diluted 1:5 in nuclease-free H<sub>2</sub>O. RT-qPCR was performed in triplicate using the Power SYBR  
666 Green PCR master mix (Thermo Fisher Scientific) and the Applied Biosystems Step One Plus or  
667 QuantStudio 6 Flex RT-PCR systems. The oligonucleotide sequences used are listed in Table  
668 S5.

669  
670 **Nuclear/Cytoplasmic Fractionation.** Following siRNA treatment (36 h) and IFN- $\beta$  treatment (20  
671 h), cells were harvested and lysed in 200  $\mu$ L lysis buffer (10 mM Tris-HCl [pH 7.4], 140 mM NaCl,  
672 1.5 mM MgCl<sub>2</sub>, 10 mM EDTA, 0.5% Nonidet P-40 (NP-40)) on ice for 10 minutes. Following  
673 centrifugation at 12000 X g at 4°C for 5 minutes, the supernatant (cytoplasmic fraction) was  
674 collected, and the nuclear pellet was rinsed twice with lysis buffer. RNA was extracted from  
675 cytoplasmic and nuclear pellets using TRIzol reagent and analyzed by RT-qPCR.

676  
677 **Protein Stability Analysis.** Following siRNA treatment (36 h), Huh7 cells were treated with IFN-  
678  $\beta$  for 16 hours to induce ISGs. IFN- $\beta$  was then replenished at half the dose in cDMEM containing  
679 either DMSO as a control, or 50  $\mu$ g/mL cycloheximide (CHX, Sigma-Aldrich). Cells were harvested  
680 over a timecourse (0, 2, 4, 6, 8, 12 hours post-CHX) and subjected to immunoblotting. Protein  
681 stability was determined by measuring the protein remaining at each timepoint following CHX  
682 treatment.

683  
684 **Polysome Profiling.** Cells treated with siRNAs (36 h) were treated with IFN- $\beta$  for 6 hours, then  
685 pulsed with CHX (50  $\mu$ g/mL) for 10 minutes. Cells were harvested using trypsin and then lysed in  
686 cytoplasmic lysis buffer (200 mM KCl, 25 mM HEPES [pH 7.0], 10 mM MgCl<sub>2</sub>, 2% n-Dodecyl  $\beta$ -  
687 D-maltoside (DDM; Chem-Impex), 0.2 mM CHX, 1 mM DTT, 40 U RNasin) for 15 minutes on ice.  
688 Following clarification, lysates were ultracentrifuged on 15-50% sucrose gradients prepared in  
689 polysome gradient buffer (200 mM KCl, 25 mM HEPES [pH 7.0], 15 mM MgCl<sub>2</sub>, 1 mM DTT, 0.2  
690 mM CHX) at 35,000 X g for 3.5 hours at 4°C. Following ultracentrifugation, 24 fractions were  
691 collected from each sample using a BioComp Piston Gradient Fractionator instrument fitted with  
692 a TRIAX flow cell to measure absorbance. RNA was extracted from each fraction using TRIzol  
693 LS reagent (Thermo Fisher Scientific), and RNA quality was checked on a 1% agarose gel.  
694 Following cDNA synthesis using the iScript cDNA synthesis kit (Bio-Rad), RT-qPCR was  
695 performed using primers specific for each gene.



696

697 **MeRIP-RT-qPCR.** Total cellular RNA was harvested using TRIzol reagent and normalized to  
698 equal input concentrations. m<sup>6</sup>A-positive and m<sup>6</sup>A-negative control oligonucleotides (EpiMark N6-  
699 Methyladenosine Enrichment Kit, New England Biolabs) were spiked into total RNA prior to  
700 immunoprecipitation. RNA was then immunoprecipitated with anti-m<sup>6</sup>A antibody (New England  
701 Biolabs) overnight at 4°C with head-over-tail rotation, and then washed twice with 1X reaction  
702 buffer (150mM NaCl, 10mM Tris-HCl, pH 7.5, 0.1% NP40), twice with low salt wash buffer (50  
703 mM NaCl, 10 mM Tris-HCl, pH 7.5, 0.1% NP-40), twice with high salt wash buffer (500 mM NaCl,  
704 10 mM Tris-HCl, pH 7.5, 0.1% NP-40), and once with 1X reaction buffer. RNA was eluted from  
705 beads in elution buffer twice for 1 hour at 4°C, and then precipitated in isopropanol overnight at -  
706 20°C, pelleted by centrifugation, and resuspended in nuclease-free water. Equal volumes of  
707 eluted RNA and input RNA were used for cDNA synthesis and quantified by RT-qPCR. IP  
708 efficiency was normalized by relative pulldown of spike-in positive controls.

709

710 **Luciferase Assays.** Following plasmid transfection of WT and m<sup>6</sup>A-mut IFITM1 3' UTR reporters  
711 and mock or IFN-β treatment (12 h), a dual luciferase assay (Promega) was performed according  
712 to manufacturer's instructions. Data was normalized as fold-change (IFN-β over mock) of the  
713 value of *Renilla* luminescence divided by firefly luminescence, and values for WT IFITM1 3' UTR  
714 reporter were set as 1.

715

716 **RNA Immunoprecipitation.** Following DNA transfection (16 h) and IFN-β treatment (8 h), cells  
717 were harvested and lysed in polysome lysis buffer (100 mM KCl, 5 mM MgCl<sub>2</sub>, 10 mM HEPES  
718 [pH 7.0], 0.5% NP-40) supplemented with protease inhibitor cocktail (Sigma) and RNasin  
719 ribonuclease inhibitor (Promega), and lysates were cleared by centrifugation. Ribonucleoprotein  
720 complexes were immunoprecipitated with anti-FLAG M2 beads (Sigma) overnight at 4°C with  
721 head-over-tail rotation, and then washed five times in ice-cold NT2 buffer (50 mM Tris-HCl [pH  
722 7.4], 150 mM NaCl, 1 mM MgCl<sub>2</sub>, 0.05% NP-40). Protein for immunoblotting was eluted from 25  
723 percent of beads by boiling in 2X Laemmli sample buffer (Bio-Rad). RNA was extracted from 75  
724 percent of beads using TRIzol reagent (Thermo Fisher Scientific). Equal volumes of eluted RNA  
725 were used for cDNA synthesis, quantified by RT-qPCR, and normalized to RNA levels in input  
726 samples. Enrichment over GFP was then calculated and plotted.

727

728 **RNA-seq.** Following siRNA treatment (36 h), Huh7 cells seeded in 10-cm<sup>2</sup> plates were stimulated  
729 with IFN-β or mock treated (8 h), then harvested and RNA extraction was performed using TRIzol

730 reagent (Thermo Fisher Scientific). Samples were then treated with Turbo DNase I (Thermo  
731 Fisher Scientific) according to manufacturer protocol and incubated at 37°C for 30 min, followed  
732 by phenol/chloroform extraction and ethanol precipitation overnight. RNA concentrations were  
733 then normalized. Sequencing libraries were prepared using the KAPA Stranded mRNA-Seq Kit  
734 (Roche) and sequenced on an Illumina HiSeq 4000 with 100 bp paired-end reads by the Duke  
735 University Center for Genomic and Computational Biology.

736

737 **Ribo-seq.** Following siRNA treatment (36 h), Huh7 cells seeded in 15-cm<sup>2</sup> plates were stimulated  
738 with IFN- $\beta$  (8 h), then washed with ice cold PBS, and flash frozen in liquid nitrogen. Cells were  
739 then lysed in plates with polysome lysis buffer (20 mM Tris-HCl [pH 7.4], 150 mM NaCl, 5 mM  
740 MgCl<sub>2</sub>, 1 mM DTT, 1% Triton X-100, 25 U/mL Turbo DNase I (Thermo Fisher Scientific)), scraped,  
741 and passed through a 25 gauge needle before collection in microfuge tubes and incubation for 15  
742 minutes on ice. Cytoplasmic lysates were clarified by centrifugation. 5% of lysate was taken for  
743 western blotting, and the remaining cytoplasmic lysate was supplemented with 0.4M CaCl<sub>2</sub> and  
744 4000 gel units micrococcal nuclease (New England Biolabs), and incubated at 37°C (30 min) to  
745 generate ribosome protected fragments (RPF RNA). RPF RNA was then ultracentrifuged (35000  
746 X g at 4°C for 3.5 h), over 15-50% sucrose gradients in polysome gradient buffer (20 mM Tris-  
747 HCl [pH 7.4], 150 mM NaCl, 5 mM MgCl<sub>2</sub>, 1 mM DTT), after which 12 fractions were collected  
748 from each sample using a BioComp Piston Gradient Fractionator instrument fitted with a TRIAX  
749 flow cell to measure absorbance. Monosome fractions (fractions 6 and 7) were then pooled and  
750 loaded onto a 100 kD molecular weight cut-off filter (Vivaspin 20) and centrifuged at 3000 X g at  
751 4°C for 35 minutes to concentrate monosome-bound RPF RNA. The flow-through was discarded  
752 and retained monosomes were separated from RPF RNA by adding polysome lysis buffer  
753 supplemented with 50 mM EDTA and incubation on ice for 15 minutes. The resulting RPF RNA  
754 solution was then re-applied to the emptied 100 kD molecular weight cut-off filter and centrifuged  
755 at 3000 X g at 4°C for 15 minutes to separate RPF RNA from monosomes. The flow-through  
756 containing the RPF RNA was then collected, phenol-chloroform extracted, and ethanol  
757 precipitated. Precipitated RPF RNA samples were then run on a 15% TBE-Urea gel (Invitrogen),  
758 and a band corresponding to 28-32 nucleotides was excised, crushed, and incubated in 0.4M  
759 NaCl with 40 units of RNasin ribonuclease inhibitor (Promega) for 8 hours shaking at 4°C 1100  
760 RPM. RNA was recovered by filtration through Corning Costar Spin-X columns (Sigma-Aldrich)  
761 then isopropanol precipitated overnight. After resuspension, the remaining RNA was T4  
762 Polynucleotide Kinase (New England Biolabs) treated, phenol-chloroform extracted, and  
763 precipitated in ethanol overnight. Sequencing libraries for RPF samples were then generated

764 using the NEB Next small RNA library prep kit and these libraries were sequenced on an Illumina  
765 NextSeq 500 High-output 75 bp with paired end reads by the Duke University Center for Genomic  
766 and Computational Biology.

767

768 **RNA-seq and Ribo-seq Data Analysis.** Reads were evaluated using FastQC and trimmed using  
769 cutadapt (Martin, 2011), followed by alignment to the hg38 human reference genome using the  
770 STAR aligner with default parameters. The number of read fragments uniquely aligned to each  
771 gene were counted with the Gencode v21 main comprehensive gene annotation file (aggregated  
772 by gene\_name) using featureCounts. Using a python script, the raw counts from each replicate  
773 and condition were merged to generate a count matrix with N rows/genes and M samples/columns  
774 (python scripts for count-matrix generation are open-source and online on GitHub  
775 ([https://github.com/hmourelatos/McFadden\\_ISG\\_m6a\\_countMatricies](https://github.com/hmourelatos/McFadden_ISG_m6a_countMatricies))). To identify differentially  
776 expressed genes between various groups, we used DESeq2 (Love et al., 2014) to perform three  
777 pairwise contrasts. First, with RNA-seq we compared the effects of IFN- $\beta$  and mock treatment in  
778 cells transfected with siCTRL (Table S1.1). Additional RNA-seq analyses included comparison of  
779 siMETTL3/14 and siCTRL treated cells after both IFN- $\beta$  and mock treatment (Tables S1.2 and  
780 S1.3, respectively). Finally, with Ribo-seq, we compared siMETTL3/14 and siCTRL treated cells  
781 following IFN- $\beta$  treatment (Table S4). In each case, DESeq2 was applied with no additional  
782 covariates and results shown in Tables S1.1, S1.2, and S3 respectively. Metagene plots from  
783 Ribo-seq reads were composed using deepTools v3.1 (Ramírez et al., 2016) with the  
784 computeMatrix utility. RNA-seq heatmap was generated using R software, and the heatmap for  
785 Ribo-seq was generated using ClustVis (Metsalu and Vilo, 2015).

786

787 **Mass Spectrometry.** Prior to the siRNA experiments, cells were grown for at least 12 generations  
788 in DMEM medium without Lysine and Arginine (#PI88420), supplemented with Dialyzed FBS  
789 (#26000044), either light or heavy L-Arginine and L-Lysine (L-Arginine-HCl #PI88427; L-Arginine-  
790 HCl, 13C6, 15N4 #PI88434; L-Lysine-2HCl #PI88429; L-Lysine-2HCl, 13C6, 15N2 #PI88432),  
791 and 100 U/ml penicillin, 100  $\mu$ g/ml streptomycin and 2 mM L-glutamine. Following stable isotope  
792 labeling, siRNA-treated cells (36 h) were stimulated with IFN- $\beta$  for 24 hours prior to harvest by  
793 trypsinization and lysis in RIPA buffer supplemented with protease inhibitor cocktail (Sigma) and  
794 phosphatase inhibitor cocktail II (Millipore), and post-nuclear lysates were harvested by  
795 centrifugation. 5  $\mu$ L at 1  $\mu$ g/ $\mu$ L of siMETTL3/14 (Heavy) extracts were mixed with 5  $\mu$ L at 1  $\mu$ g/ $\mu$ L  
796 of siCTRL (Light) extracts for the Forward experiment, and 5  $\mu$ L at 1  $\mu$ g/ $\mu$ L of siMETTL3/14 (Light)  
797 extracts were mixed with 5  $\mu$ L at 1  $\mu$ g/ $\mu$ L of siCTRL (Heavy) extracts for the Reverse experiment.

798 The lysates were run on a 4-12% Bis-Tris gel for 30 min. The gel was stained with Colloidal  
799 Coomassie and a single patch was cut and processed for each sample. The gel patches were  
800 digested with trypsin. The resulting peptides were cleaned with a C18 tip. Liquid chromatography  
801 was performed with an EASY-nLC™ 1000 Integrated Ultra High Pressure Nano-HPLC System  
802 and MS/MS with a Q-EXACTIVE System equipped with a Nanospray Flex Ion Source, as  
803 previously described (Abell et al., 2017).

804

805 **Mass Spectrometry data analysis.** Four RAW files representing two replicates each of Forward  
806 and Reverse SILAC experiments were retrieved from the Orbitrap. Heavy/light label ratios were  
807 quantified across all samples using MaxQuant v1.6.7.0 with the Andromeda search engine and  
808 default parameters other than specifying SILAC labels (Cox and Mann, 2008; Cox et al., 2011).  
809 For all analyses, the “H/L Ratio – Normalized” field containing median-centered label ratios was  
810 extracted for each peptide and/or protein and compared across replicates (Table S3). Heatmaps  
811 for mass spectrometry were generated using ClustVis (Metsalu and Vilo, 2015).

812

813 Peptide regression modeling:

814 To take advantage of the measurement independence of unique peptides, we applied a simple  
815 linear mixed model to identify significant shifts in labeling ratio between conditions while  
816 accounting for peptide-specific effects. First, we merge all proteins that are described by the same  
817 set of peptide ratios (e.g. protein sequences from the same gene for which all detected peptides  
818 are shared). Then, for each protein (defined now as a set of peptide ratios), we fit a linear model  
819 of the following form using lme4 in R (Bates et al., 2015)

820

$$r \sim Z\mathbf{u}_{pep} + X\beta_{label} + \epsilon$$

821 where:

- 822 •  $r$  is the median-normalized heavy/light label ratio derived from MaxQuant
- 823 •  $Z$  is a binary design matrix indicating the peptide identity of each ratio measurement
- 824 •  $X$  is a binary design vector indicating condition (forward or reverse)
- 825 •  $\mathbf{u}_{pep}$  is a vector of random effects corresponding to each peptide effect
- 826 •  $\beta_{label}$  is the fixed effect of condition

827 Thus, each peptide ratio is described as the sum of a peptide-level random effect and a condition  
828 (forward vs reverse) fixed effect, and some error. We extract effect size estimates and p-values  
829 from unmodified Wald tests on the fixed effect of condition, and adjust across all proteins with the  
830 Benjamini-Hochberg (BH) procedure. Note that in the less-powerful case of proteins with only one

831 measured peptide, the random peptide effect is just a constant and the model reduces to simply  
832 comparing the means of the forward and reverse replicate ratios for the single peptide.

833

834 Aggregating proteins for gene-level results:

835 Peptide regression modeling generates one test for each protein, so many genes are tested  
836 multiple times at each of their proteins. Annotated reference protein sequences often contain  
837 multiple entries per gene with varying degrees of similarity. After applying the procedure above,  
838 we observe as expected that the vast majority of genes contain either all significant or all non-  
839 significant protein results. We conservatively describe as significant any gene with a significant  
840 maximum p-value (meaning all tested proteins are significant) following multiple test correction.

841

842 **Lead Contact and Materials Availability.** Further information and requests for resources and  
843 reagents should be directed to and will be fulfilled by the Lead Contact, Stacy M. Horner  
844 ([stacy.horner@duke.edu](mailto:stacy.horner@duke.edu)).

845

846 **Data Availability.** All raw data from RNA-seq, MeRIP-seq, and Ribo-seq are available through  
847 GEO (accession number: GSE155448).

848 Raw data from mass spectrometry are available at the following URLs:

849 <https://web.corral.tacc.utexas.edu/xhemalce/Forward1.raw>

850 <https://web.corral.tacc.utexas.edu/xhemalce/Forward2.raw>

851 <https://web.corral.tacc.utexas.edu/xhemalce/Reverse1.raw>

852 <https://web.corral.tacc.utexas.edu/xhemalce/Reverse2.raw>

853

854 **Supplemental Information**

855 Supplemental information Figures S1-S4.

856 Table S1: RNA-seq analysis of gene expression changes following IFN- $\beta$  treatment and  
857 METTL3/14 depletion.

- 858 • Table S1.1: siCTRL IFN / siCTRL Mock
- 859 • Table S1.2: siMETTL3/14 Mock / siCTRL Mock
- 860 • Table S1.3: siMETTL3/14 IFN / siCTRL IFN

861 Table S2: m<sup>6</sup>A peaks in the IFN- $\beta$  induced transcriptome.

- 862 • Table S2.1: Input RNA-seq Analysis (IFN / Mock)
- 863 • Table S2.2: MeTDiff m<sup>6</sup>A Peaks
- 864 • Table S2.3: meRIPPer m<sup>6</sup>A Peaks

865 Table S3: Analysis of METTL3/14 depletion effect on protein expression using quantitative mass  
866 spectrometry.

867 Table S4: Analysis of Ribo-seq data from METTL3/14 depletion and IFN- $\beta$  treatment.

868 Table S5: List of oligonucleotides and siRNAs used in this study.

869

870

871 **References**

872

873 Abell, N.S., Mercado, M., Caneque, T., Rodriguez, R., and Xhemalce, B. (2017). Click  
874 Quantitative Mass Spectrometry Identifies PIWIL3 as a Mechanistic Target of RNA Interference  
875 Activator Enoxacin in Cancer Cells. *J. Am. Chem. Soc.* *139*, 1400-1403.

876 Banchereau, J., and Pascual, V. (2006). Type I interferon in systemic lupus erythematosus and  
877 other autoimmune diseases. *Immunity* *25*, 383-392.

878 Bates, D., Mächler, M., Bolker, B., and Walker, S. (2015). Fitting Linear Mixed-Effects Models  
879 Using lme4. *Journal of Statistical Software* *67*, 48.

880 Bolger, A.M., Lohse, M., and Usadel, B. (2014). Trimmomatic: a flexible trimmer for Illumina  
881 sequence data. *Bioinformatics* *30*, 2114-2120.

882 Boulias, K., Toczydlowska-Socha, D., Hawley, B.R., Liberman, N., Takashima, K., Zaccara, S.,  
883 Guez, T., Vasseur, J.J., Debart, F., Aravind, L., *et al.* (2019). Identification of the m(6)Am  
884 Methyltransferase PCIF1 Reveals the Location and Functions of m(6)Am in the Transcriptome.  
885 *Mol. Cell* *75*, 631-643.e638.

886 Buchrieser, J., Degrelle, S.A., Couderc, T., Nevers, Q., Disson, O., Manet, C., Donahue, D.A.,  
887 Porrot, F., Hillion, K.H., Perthame, E., *et al.* (2019). IFITM proteins inhibit placental  
888 syncytiotrophoblast formation and promote fetal demise. *Science* *365*, 176-180.

889 Chen, Y.G., Chen, R., Ahmad, S., Verma, R., Kasturi, S.P., Amaya, L., Broughton, J.P., Kim, J.,  
890 Cadena, C., Pulendran, B., *et al.* (2019). N6-Methyladenosine Modification Controls Circular  
891 RNA Immunity. *Mol. Cell* *76*, 96-109.e109.

892 Cheon, H., Borden, E.C., and Stark, G.R. (2014). Interferons and their stimulated genes in the  
893 tumor microenvironment. *Semin. Oncol.* *41*, 156-173.

894 Coats, R.A., Liu, X.M., Mao, Y., Dong, L., Zhou, J., Wan, J., Zhang, X., and Qian, S.B. (2017).  
895 m(6)A Facilitates eIF4F-Independent mRNA Translation. *Mol. Cell* *68*, 504-514.e507.

896 Cox, J., and Mann, M. (2008). MaxQuant enables high peptide identification rates, individualized  
897 p.p.b.-range mass accuracies and proteome-wide protein quantification. *Nat. Biotechnol.* *26*,  
898 1367-1372.

899 Cox, J., Neuhauser, N., Michalski, A., Scheltema, R.A., Olsen, J.V., and Mann, M. (2011).  
900 Andromeda: a peptide search engine integrated into the MaxQuant environment. *J. Proteome*  
901 *Res.* *10*, 1794-1805.

- 902 Cui, X., Zhang, L., Meng, J., Rao, M.K., Chen, Y., and Huang, Y. (2018). MeTDiff: A Novel  
903 Differential RNA Methylation Analysis for MeRIP-Seq Data. *IEEE/ACM Trans. Comput. Biol.*  
904 *Bioinform.* 15, 526-534.
- 905 Dobin, A., Davis, C.A., Schlesinger, F., Drenkow, J., Zaleski, C., Jha, S., Batut, P., Chaisson,  
906 M., and Gingeras, T.R. (2013). STAR: ultrafast universal RNA-seq aligner. *Bioinformatics* 29,  
907 15-21.
- 908 Dominissini, D., Moshitch-Moshkovitz, S., Schwartz, S., Salmon-Divon, M., Ungar, L.,  
909 Osenberg, S., Cesarkas, K., Jacob-Hirsch, J., Amariglio, N., Kupiec, M., *et al.* (2012). Topology  
910 of the human and mouse m6A RNA methylomes revealed by m6A-seq. *Nature* 485, 201-206.
- 911 Durbin, A.F., Wang, C., Marcotrigiano, J., and Gehrke, L. (2016). RNAs Containing Modified  
912 Nucleotides Fail To Trigger RIG-I Conformational Changes for Innate Immune Signaling. *mBio*  
913 7.
- 914 Fang, T.C., Schaefer, U., Mecklenbrauker, I., Stienen, A., Dewell, S., Chen, M.S., Rioja, I.,  
915 Parravicini, V., Prinjha, R.K., Chandwani, R., *et al.* (2012). Histone H3 lysine 9 di-methylation as  
916 an epigenetic signature of the interferon response. *J. Exp. Med.* 209, 661-669.
- 917 Feng, Z., Li, Q., Meng, R., Yi, B., and Xu, Q. (2018). METTL3 regulates alternative splicing of  
918 MyD88 upon the lipopolysaccharide-induced inflammatory response in human dental pulp cells.  
919 *J. Cell. Mol. Med.* 22, 2558-2568.
- 920 Forster, S.C., Tate, M.D., and Hertzog, P.J. (2015). MicroRNA as Type I Interferon-Regulated  
921 Transcripts and Modulators of the Innate Immune Response. *Front. Immunol.* 6, 334.
- 922 Froggatt, H.M., Harding, A.T., and Heaton, N.S. (2019). ETV7 represses a subset of interferon-  
923 stimulated genes that restrict influenza viruses. *bioRxiv*, 851543.
- 924 Gokhale, N.S., McIntyre, A.B.R., Mattocks, M.D., Holley, C.L., Lazear, H.M., Mason, C.E., and  
925 Horner, S.M. (2019). Altered m(6)A Modification of Specific Cellular Transcripts Affects  
926 Flaviviridae Infection. *Mol. Cell.*
- 927 Gonzalez-Navajas, J.M., Lee, J., David, M., and Raz, E. (2012). Immunomodulatory functions of  
928 type I interferons. *Nat. Rev. Immunol.* 12, 125-135.
- 929 Heinz, S., Benner, C., Spann, N., Bertolino, E., Lin, Y.C., Laslo, P., Cheng, J.X., Murre, C.,  
930 Singh, H., and Glass, C.K. (2010). Simple combinations of lineage-determining transcription  
931 factors prime cis-regulatory elements required for macrophage and B cell identities. *Mol. Cell*  
932 38, 576-589.
- 933 Huang, M., Qian, F., Hu, Y., Ang, C., Li, Z., and Wen, Z. (2002). Chromatin-remodelling factor  
934 BRG1 selectively activates a subset of interferon-alpha-inducible genes. *Nat. Cell Biol.* 4, 774-  
935 781.



- 936 Imam, H., Khan, M., Gokhale, N.S., McIntyre, A.B.R., Kim, G.W., Jang, J.Y., Kim, S.J., Mason,  
937 C.E., Horner, S.M., and Siddiqui, A. (2018). N6-methyladenosine modification of hepatitis B  
938 virus RNA differentially regulates the viral life cycle. *Proc. Natl. Acad. Sci. U. S. A.* *115*, 8829-  
939 8834.
- 940 Kariko, K., Buckstein, M., Ni, H., and Weissman, D. (2005). Suppression of RNA recognition by  
941 Toll-like receptors: the impact of nucleoside modification and the evolutionary origin of RNA.  
942 *Immunity* *23*, 165-175.
- 943 Kennedy, E.M., Bogerd, H.P., Kornepati, A.V., Kang, D., Ghoshal, D., Marshall, J.B., Poling,  
944 B.C., Tsai, K., Gokhale, N.S., Horner, S.M., *et al.* (2016). Posttranscriptional m(6)A Editing of  
945 HIV-1 mRNAs Enhances Viral Gene Expression. *Cell Host Microbe* *19*, 675-685.
- 946 Lesbirel, S., and Wilson, S.A. (2019). The m(6)Amethylase complex and mRNA export. *Biochim*  
947 *Biophys Acta Gene Regul Mech* *1862*, 319-328.
- 948 Li, A., Chen, Y.S., Ping, X.L., Yang, X., Xiao, W., Yang, Y., Sun, H.Y., Zhu, Q., Baidya, P.,  
949 Wang, X., *et al.* (2017). Cytoplasmic m(6)A reader YTHDF3 promotes mRNA translation. *Cell*  
950 *Res.* *27*, 444-447.
- 951 Liao, Y., Smyth, G.K., and Shi, W. (2014). featureCounts: an efficient general purpose program  
952 for assigning sequence reads to genomic features. *Bioinformatics* *30*, 923-930.
- 953 Lin, S., Choe, J., Du, P., Triboulet, R., and Gregory, R.I. (2016). The m(6)A Methyltransferase  
954 METTL3 Promotes Translation in Human Cancer Cells. *Mol. Cell* *62*, 335-345.
- 955 Liu, H., Kang, H., Liu, R., Chen, X., and Zhao, K. (2002). Maximal induction of a subset of  
956 interferon target genes requires the chromatin-remodeling activity of the BAF complex. *Mol.*  
957 *Cell. Biol.* *22*, 6471-6479.
- 958 Liu, J., Harada, B.T., and He, C. (2019a). Regulation of Gene Expression by N(6)-  
959 methyladenosine in Cancer. *Trends Cell Biol.* *29*, 487-499.
- 960 Liu, J., Yue, Y., Han, D., Wang, X., Fu, Y., Zhang, L., Jia, G., Yu, M., Lu, Z., Deng, X., *et al.*  
961 (2014). A METTL3-METTL14 complex mediates mammalian nuclear RNA N6-adenosine  
962 methylation. *Nat. Chem. Biol.* *10*, 93-95.
- 963 Liu, Y., You, Y., Lu, Z., Yang, J., Li, P., Liu, L., Xu, H., Niu, Y., and Cao, X. (2019b). N (6)-  
964 methyladenosine RNA modification-mediated cellular metabolism rewiring inhibits viral  
965 replication. *Science* *365*, 1171-1176.
- 966 Love, M.I., Huber, W., and Anders, S. (2014). Moderated estimation of fold change and  
967 dispersion for RNA-seq data with DESeq2. *Genome Biol.* *15*, 550.

- 968 Lu, M., Zhang, Z., Xue, M., Zhao, B.S., Harder, O., Li, A., Liang, X., Gao, T.Z., Xu, Y., Zhou, J.,  
969 *et al.* (2020). N(6)-methyladenosine modification enables viral RNA to escape recognition by  
970 RNA sensor RIG-I. *Nat Microbiol* 5, 584-598.
- 971 Mao, Y., Dong, L., Liu, X.M., Guo, J., Ma, H., Shen, B., and Qian, S.B. (2019). m(6)A in mRNA  
972 coding regions promotes translation via the RNA helicase-containing YTHDC2. *Nat Commun*  
973 10, 5332.
- 974 Martin, M. (2011). Cutadapt removes adapter sequences from high-throughput sequencing  
975 reads. *EMBnet Journal* 17, 10-12.
- 976 McIntyre, A.B.R., Gokhale, N.S., Cerchiatti, L., Jaffrey, S.R., Horner, S.M., and Mason, C.E.  
977 (2020). Limits in the detection of m(6)A changes using MeRIP/m(6)A-seq. *Sci. Rep.* 10, 6590.
- 978 Metsalu, T., and Vilo, J. (2015). ClustVis: a web tool for visualizing clustering of multivariate  
979 data using Principal Component Analysis and heatmap. *Nucleic Acids Res.* 43, W566-570.
- 980 Meyer, K.D., and Jaffrey, S.R. (2017). Rethinking m(6)A Readers, Writers, and Erasers. *Annu.*  
981 *Rev. Cell Dev. Biol.* 33, 319-342.
- 982 Meyer, K.D., Saletore, Y., Zumbo, P., Elemento, O., Mason, C.E., and Jaffrey, S.R. (2012).  
983 Comprehensive analysis of mRNA methylation reveals enrichment in 3' UTRs and near stop  
984 codons. *Cell* 149, 1635-1646.
- 985 Miller, D.M., Zhang, Y., Rahill, B.M., Waldman, W.J., and Sedmak, D.D. (1999). Human  
986 cytomegalovirus inhibits IFN-alpha-stimulated antiviral and immunoregulatory responses by  
987 blocking multiple levels of IFN-alpha signal transduction. *J. Immunol.* 162, 6107-6113.
- 988 Muller, U., Steinhoff, U., Reis, L.F., Hemmi, S., Pavlovic, J., Zinkernagel, R.M., and Aguet, M.  
989 (1994). Functional role of type I and type II interferons in antiviral defense. *Science* 264, 1918-  
990 1921.
- 991 Ogino, T., and Banerjee, A.K. (2011). An unconventional pathway of mRNA cap formation by  
992 vesiculoviruses. *Virus Res.* 162, 100-109.
- 993 Perwitasari, O., Cho, H., Diamond, M.S., and Gale, M., Jr. (2011). Inhibitor of  $\kappa$ B kinase epsilon  
994 (IKK(epsilon)), STAT1, and IFIT2 proteins define novel innate immune effector pathway against  
995 West Nile virus infection. *J. Biol. Chem.* 286, 44412-44423.
- 996 Ping, X.L., Sun, B.F., Wang, L., Xiao, W., Yang, X., Wang, W.J., Adhikari, S., Shi, Y., Lv, Y.,  
997 Chen, Y.S., *et al.* (2014). Mammalian WTAP is a regulatory subunit of the RNA N6-  
998 methyladenosine methyltransferase. *Cell Res.* 24, 177-189.
- 999 Pulit-Penalzoza, J.A., Scherbik, S.V., and Brinton, M.A. (2012). Type 1 IFN-independent  
1000 activation of a subset of interferon stimulated genes in West Nile virus Eg101-infected mouse  
1001 cells. *Virology* 425, 82-94.

- 1002 Ramírez, F., Ryan, D.P., Grüning, B., Bhardwaj, V., Kilpert, F., Richter, A.S., Heyne, S., Dündar,  
1003 F., and Manke, T. (2016). deepTools2: a next generation web server for deep-sequencing data  
1004 analysis. *Nucleic Acids Res.* *44*, W160-165.
- 1005 Rose, K.M., Elliott, R., Martinez-Sobrido, L., Garcia-Sastre, A., and Weiss, S.R. (2010). Murine  
1006 coronavirus delays expression of a subset of interferon-stimulated genes. *J. Virol.* *84*, 5656-  
1007 5669.
- 1008 Rubio, R.M., Depledge, D.P., Bianco, C., Thompson, L., and Mohr, I. (2018). RNA m(6) A  
1009 modification enzymes shape innate responses to DNA by regulating interferon beta. *Genes*  
1010 *Dev.* *32*, 1472-1484.
- 1011 Schoggins, J.W. (2014). Interferon-stimulated genes: roles in viral pathogenesis. *Curr. Opin.*  
1012 *Virol.* *6*, 40-46.
- 1013 Schoggins, J.W. (2019). Interferon-Stimulated Genes: What Do They All Do? Annual review of  
1014 virology *6*, 567-584.
- 1015 Schoggins, J.W., and Rice, C.M. (2011). Interferon-stimulated genes and their antiviral effector  
1016 functions. *Curr. Opin. Virol.* *1*, 519-525.
- 1017 Seifert, L.L., Si, C., Saha, D., Sadic, M., de Vries, M., Ballentine, S., Briley, A., Wang, G.,  
1018 Valero-Jimenez, A.M., Mohamed, A., *et al.* (2019). The ETS transcription factor ELF1 regulates  
1019 a broadly antiviral program distinct from the type I interferon response. *PLoS Pathog.* *15*,  
1020 e1007634.
- 1021 Sendinc, E., Valle-Garcia, D., Dhall, A., Chen, H., Henriques, T., Navarrete-Perea, J., Sheng,  
1022 W., Gygi, S.P., Adelman, K., and Shi, Y. (2019). PCIF1 Catalyzes m6Am mRNA Methylation to  
1023 Regulate Gene Expression. *Mol. Cell* *75*, 620-630.e629.
- 1024 Shaw, A.E., Hughes, J., Gu, Q., Behdenna, A., Singer, J.B., Dennis, T., Orton, R.J., Varela, M.,  
1025 Gifford, R.J., Wilson, S.J., *et al.* (2017). Fundamental properties of the mammalian innate  
1026 immune system revealed by multispecies comparison of type I interferon responses. *PLoS Biol.*  
1027 *15*, e2004086.
- 1028 Shi, G., Ozog, S., Torbett, B.E., and Compton, A.A. (2018). mTOR inhibitors lower an intrinsic  
1029 barrier to virus infection mediated by IFITM3. *Proc. Natl. Acad. Sci. U. S. A.* *115*, E10069-  
1030 e10078.
- 1031 Shi, H., Wang, X., Lu, Z., Zhao, B.S., Ma, H., Hsu, P.J., Liu, C., and He, C. (2017). YTHDF3  
1032 facilitates translation and decay of N(6)-methyladenosine-modified RNA. *Cell Res.* *27*, 315-328.
- 1033 Shi, H., Wei, J., and He, C. (2019). Where, When, and How: Context-Dependent Functions of  
1034 RNA Methylation Writers, Readers, and Erasers. *Mol. Cell* *74*, 640-650.

- 1035 Stark, G.R., and Darnell, J.E., Jr. (2012). The JAK-STAT pathway at twenty. *Immunity* 36, 503-  
1036 514.
- 1037 Sumpter, R., Jr., Loo, Y.M., Foy, E., Li, K., Yoneyama, M., Fujita, T., Lemon, S.M., and Gale,  
1038 M., Jr. (2005). Regulating intracellular antiviral defense and permissiveness to hepatitis C virus  
1039 RNA replication through a cellular RNA helicase, RIG-I. *J. Virol.* 79, 2689-2699.
- 1040 Teijaro, J.R. (2016). Type I interferons in viral control and immune regulation. *Curr. Opin. Virol.*  
1041 16, 31-40.
- 1042 Wang, X., Lu, Z., Gomez, A., Hon, G.C., Yue, Y., Han, D., Fu, Y., Parisien, M., Dai, Q., Jia, G.,  
1043 *et al.* (2014). N6-methyladenosine-dependent regulation of messenger RNA stability. *Nature*  
1044 505, 117-120.
- 1045 Wang, X., Zhao, B.S., Roundtree, I.A., Lu, Z., Han, D., Ma, H., Weng, X., Chen, K., Shi, H., and  
1046 He, C. (2015). N(6)-methyladenosine Modulates Messenger RNA Translation Efficiency. *Cell*  
1047 161, 1388-1399.
- 1048 West, K.O., Scott, H.M., Torres-Odio, S., West, A.P., Patrick, K.L., and Watson, R.O. (2019).  
1049 The Splicing Factor hnRNP M Is a Critical Regulator of Innate Immune Gene Expression in  
1050 Macrophages. *Cell reports* 29, 1594-1609.e1595.
- 1051 Whelan, S.P., Barr, J.N., and Wertz, G.W. (2000). Identification of a minimal size requirement  
1052 for termination of vesicular stomatitis virus mRNA: implications for the mechanism of  
1053 transcription. *J. Virol.* 74, 8268-8276.
- 1054 Williams, G.D., Gokhale, N.S., and Horner, S.M. (2019). Regulation of Viral Infection by the  
1055 RNA Modification N6-Methyladenosine. *Annu Rev Virol* 6, 235-253.
- 1056 Williams, G.D., Gokhale, N.S., Snider, D.L., and Horner, S.M. (2020). The mRNA Cap 2'-O-  
1057 Methyltransferase CMTR1 Regulates the Expression of Certain Interferon-Stimulated Genes.  
1058 *mSphere* 5.
- 1059 Winkler, R., Gillis, E., Lasman, L., Safra, M., Geula, S., Soyris, C., Nachshon, A., Tai-  
1060 Schmiedel, J., Friedman, N., Le-Trilling, V.T.K., *et al.* (2019). m(6)A modification controls the  
1061 innate immune response to infection by targeting type I interferons. *Nat. Immunol.* 20, 173-182.
- 1062 Xie, M., Xuan, B., Shan, J., Pan, D., Sun, Y., Shan, Z., Zhang, J., Yu, D., Li, B., and Qian, Z.  
1063 (2015). Human cytomegalovirus exploits interferon-induced transmembrane proteins to facilitate  
1064 morphogenesis of the virion assembly compartment. *J. Virol.* 89, 3049-3061.
- 1065 Xu, C., Liu, K., Ahmed, H., Loppnau, P., Schapira, M., and Min, J. (2015). Structural Basis for  
1066 the Discriminative Recognition of N6-Methyladenosine RNA by the Human YT521-B Homology  
1067 Domain Family of Proteins. *J. Biol. Chem.* 290, 24902-24913.

- 1068 Yockey, L.J., and Iwasaki, A. (2018). Interferons and Proinflammatory Cytokines in Pregnancy  
1069 and Fetal Development. *Immunity* *49*, 397-412.
- 1070 Zaccara, S., and Jaffrey, S.R. (2020). A Unified Model for the Function of YTHDF Proteins in  
1071 Regulating m(6)A-Modified mRNA. *Cell* *181*, 1582-1595.e1518.
- 1072 Zhang, C., Fu, J., and Zhou, Y. (2019a). A Review in Research Progress Concerning m6A  
1073 Methylation and Immunoregulation. *Front. Immunol.* *10*, 922.
- 1074 Zhang, Y., Wang, X., Zhang, X., Wang, J., Ma, Y., Zhang, L., and Cao, X. (2019b). RNA-binding  
1075 protein YTHDF3 suppresses interferon-dependent antiviral responses by promoting FOXO3  
1076 translation. *Proc. Natl. Acad. Sci. U. S. A.* *116*, 976-981.
- 1077 Zheng, Q., Hou, J., Zhou, Y., Li, Z., and Cao, X. (2017). The RNA helicase DDX46 inhibits  
1078 innate immunity by entrapping m(6)A-demethylated antiviral transcripts in the nucleus. *Nat.*  
1079 *Immunol.* *18*, 1094-1103.
- 1080
- 1081
